# Supplementary material
Source: PubMed Central journal article supplement (PMC6004244)
Supplement: NIHMS953425-supplement-13361_2018_1907_MOESM1_ESM.pdf [file NIHMS953425-supplement-13361_2018_1907_MOESM1_ESM.pdf]

# **Negative electron transfer dissociation sequencing of 3-*O*-sulfation containing heparan sulfate oligosaccharides**

Jiandong Wu<sup>1</sup>, Juan Wei<sup>1</sup>, John D. Hogan<sup>2</sup>, Pradeep Chopra<sup>3</sup>, Apoorva Joshi<sup>3,4</sup>, Weigang Lu<sup>3,4</sup>, Joshua Klein<sup>2</sup>, Geert-Jan Boons<sup>3,4,5</sup>, Cheng Lin<sup>1</sup> and Joseph Zaia<sup>1\*</sup>

1 Center for Biomedical Mass Spectrometry, Department of Biochemistry and Center for Biomedical Mass Spectrometry, Boston University School of Medicine

2 Bioinformatics Program, Boston University, Boston, Massachusetts 02215, USA

3 Complex Carbohydrate Research Center, University of Georgia, Athens, Georgia 30602, USA

4 Department of Chemistry, University of Georgia, Athens, Georgia 30602, USA

5 Department of Chemical Biology and Drug Discovery, Utrecht Institute for Pharmaceutical Sciences and Bijvoet Center for Biomolecular Research, Utrecht University, Utrecht 3584 CG, Netherlands

Address reprint requests to Joseph Zaia,

670 Albany Street 5th floor, Boston, MA 02118

Tel: 617-638-6762

Fax: 617-638-6761

*Email Address: jzaia@bu.edu*

## List of supplemental information

Figure S1. NETD cleavage maps of synthetic HS tetrasulfated tetramers T3, GlcA-GlcNS-IdoA2S-GlcNS3S6S using different precursors: a,  $[M - 5H]^{5-}$ ; b,  $[M - 5H + Na]^4$

Figure S2. Mass spectrum of T3, showing the precursor distribution.

Figure S3. NETD tandem mass spectra of the  $[M - 5H]^{5-}$  precursor of synthetic HS hexamers: a, H1, GlcA-GlcNS6S-IdoA-GlcNS3S-GlcA-GlcNS6S; b, H2, GlcA-GlcNS6S-IdoA-GlcNS6S-GlcA-GlcNS6S; c, H3, GlcA-GlcNS6S-IdoA-GlcNS3S6S-GlcA-GlcNS6S.

Figure S4. NETD tandem mass spectra of the lyase resistant tetramers from HSPIM: a,  $\Delta$ HexA-GlcNAc6S-GlcA-GlcNS3S,  $[M - 3H]^{3-}$ ; b,  $\Delta$ HexA-GlcNAc6S-GlcA-GlcNS3S6S,  $[M - 4H]^4$ ; c,  $\Delta$ HexA2S-GlcNAc6S-GlcA-GlcNS3S6S,  $[M - 4H]^4$ ; d,  $\Delta$ HexA2S-GlcNS6S-GlcA-GlcNS3S6S,  $[M - 4H]^4$ .

Figure S5. Percent of sulfate retention in glycosidic fragment ions generated by NETD of native tetramer  $\Delta$ HexA2S-GlcNS6S-GlcA-GlcNS3S6S from HSPIM.

Table S1. List of assigned peaks in the NETD spectrum of T1,  $[M - 4H]^4$  (relative intensity was normalized to the total intensity in the spectrum, same below)

Table S2. List of assigned peaks in the NETD spectrum of T2,  $[M - 4H]^4$

Table S3. List of assigned peaks in the NETD spectrum of T3,  $[M - 4H]^4$

Table S4. List of assigned peaks in the NETD spectrum of T3,  $[M - 5H]^{5-}$

Table S5. List of assigned peaks in the NETD spectrum of T3,  $[M - 5H + Na]^4$

Table S6. List of assigned peaks in the NETD spectrum of T4,  $[M - 4H]^4$

Table S7. List of assigned peaks in the NETD spectrum of H1,  $[M - 5H]^{5-}$

Table S8. List of assigned peaks in the NETD spectrum of H2,  $[M - 5H]^{5-}$

Table S9. List of assigned peaks in the NETD spectrum of H3,  $[M - 5H]^{5-}$

Table S10. List of assigned peaks in the NETD spectrum of [1, 1, 2, 1, 3] from HSPIM,  $[M - 3H]^{3-}$

Table S11. List of assigned peaks in the NETD spectrum of [1, 1, 2, 1, 4] from HSPIM,  $[M - 4H]^4$

Table S12. List of assigned peaks in the NETD spectrum of [1, 1, 2, 1, 5] from HSPIM,  $[M - 4H]^4$

Table S13. List of assigned peaks in the NETD spectrum of [1, 1, 2, 0, 6] from HSPIM,  $[M - 4H]^4$

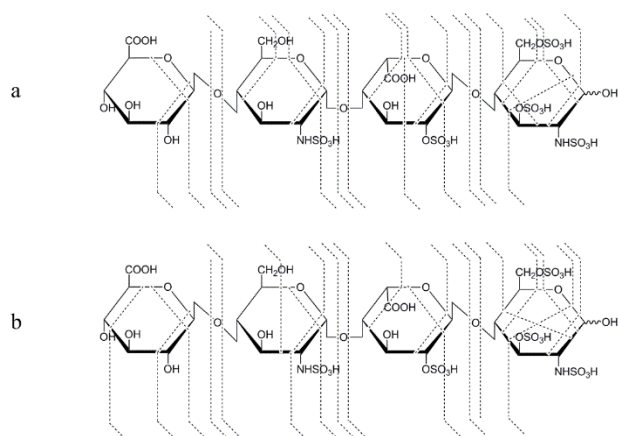

Figure S1. NETD cleavage maps of synthetic HS tetrasulfated tetramers T3, GlcA-GlcNS-IdoA2S-GlcNS3S6S using different precursors: a,  $[M - 5H]^{5-}$ ; b,  $[M - 5H + Na]^{4-}$

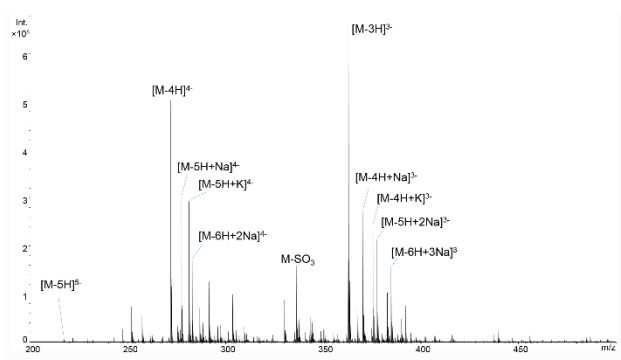

Figure S2. Mass spectrum of T3, showing the precursor distribution.

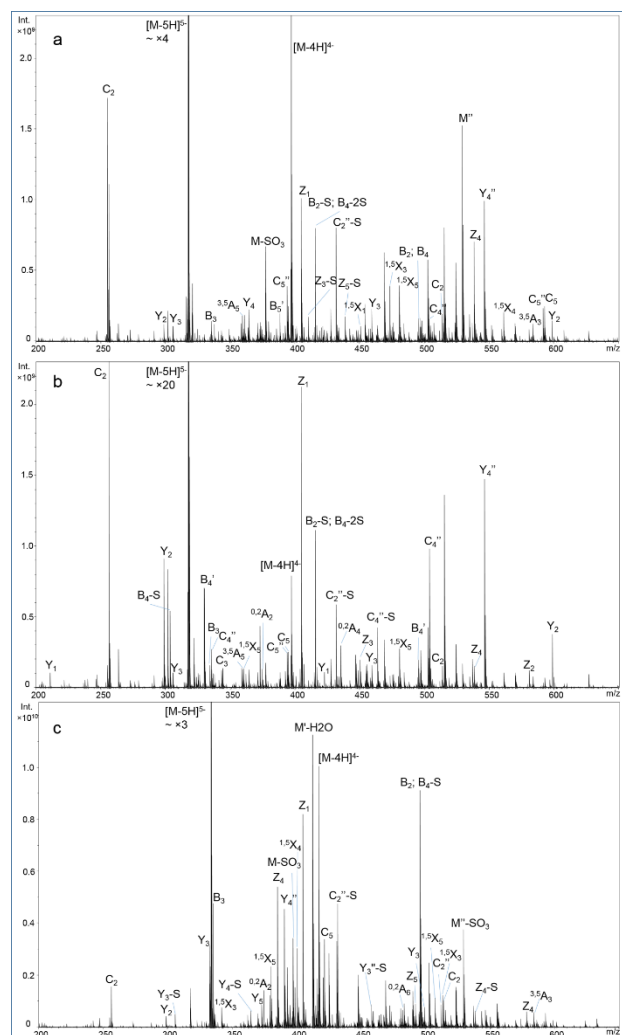

Figure S3. NETD tandem mass spectra of the  $[M - 5H]^{5-}$  precursor of synthetic HS hexamers: a, H1, GlcA-GlcNS6S-IdoA-GlcNS3S-GlcA-GlcNS6S; b, H2, GlcA-GlcNS6S-IdoA-GlcNS6S-GlcA-GlcNS6S; c, H3, GlcA-GlcNS6S-IdoA-GlcNS3S6S-GlcA-GlcNS6S.

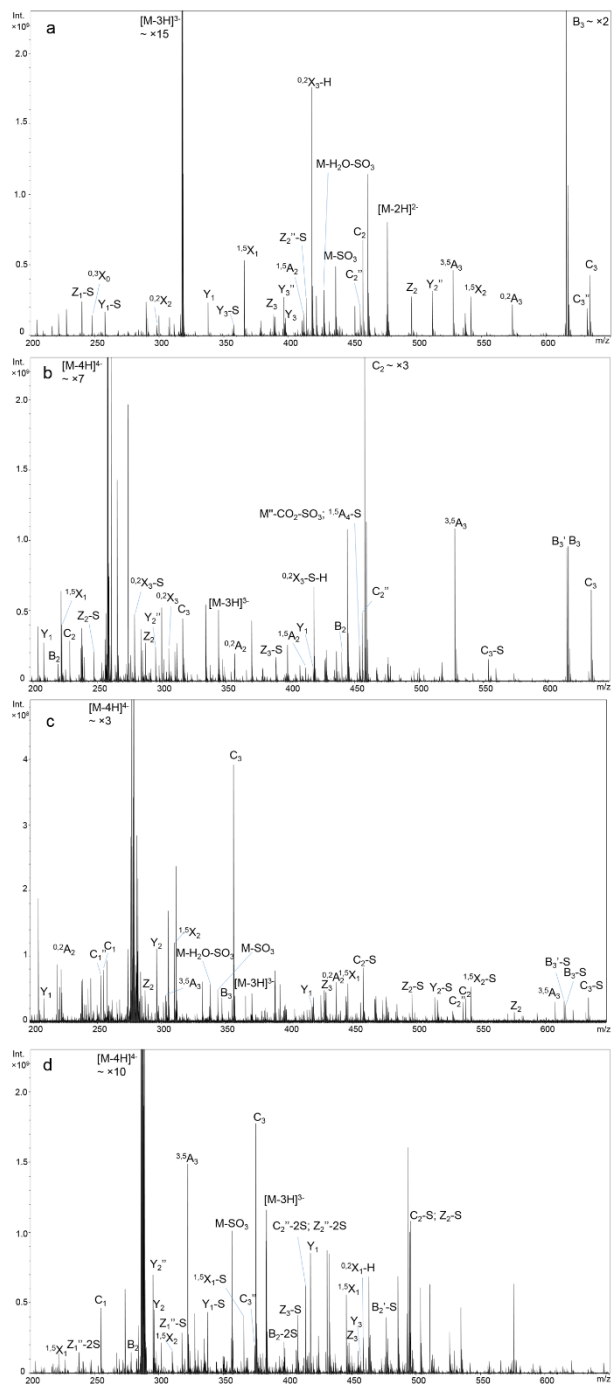

Figure S4. NETD tandem mass spectra of the lyase resistant tetramers from HSPIM: a,  $\Delta$ HexA-GlcNAc6S-GlcA-GlcNS3S,  $[M - 3H]^{3-}$ ; b,  $\Delta$ HexA-GlcNAc6S-GlcA-GlcNS3S6S,  $[M - 4H]^{4-}$ ; c,  $\Delta$ HexA2S-GlcNAc6S-GlcA-GlcNS3S6S,  $[M - 4H]^{4-}$ ; d,  $\Delta$ HexA2S-GlcNS6S-GlcA-GlcNS3S6S,  $[M - 4H]^{4-}$ .

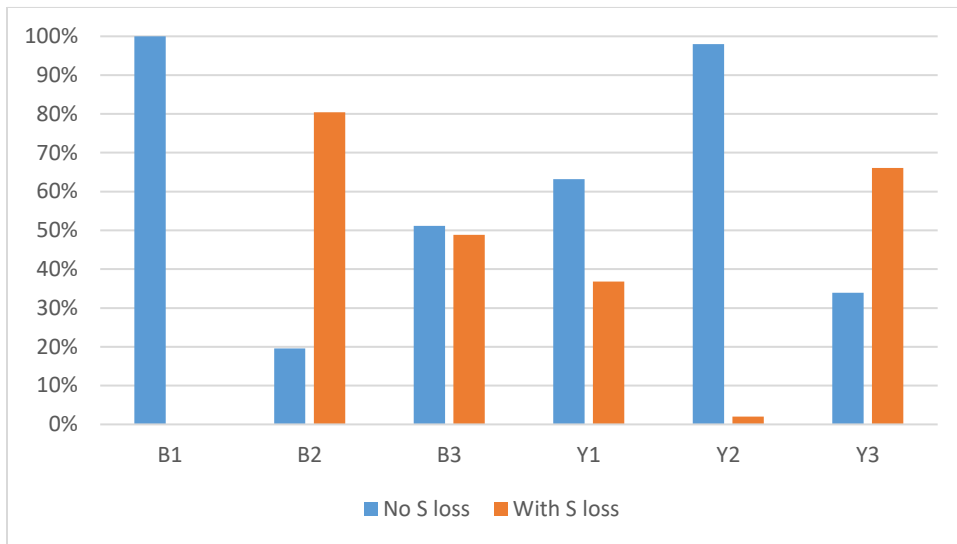

Figure S5. Percent of sulfate retention in glycosidic fragment ions generated by NETD of native tetramer  $\Delta$ HexA2S-GlcNS6S-GlcA-GlcNS3S6S from HSPIM.

Table S1. List of assigned peaks in the NETD spectrum of T1 [M - 4H]<sup>4+</sup> (relative intensity was normalized to the total intensity in the spectrum, + A = + reagent cation, same below).

| m/z      | Intensity | Charge | Error (ppm) | Assignment     |
|----------|-----------|--------|-------------|----------------|
| 159.4835 | 0.005%    | -2     | -3.05       | Z1-S           |
| 168.4888 | 0.005%    | -2     | -2.46       | Y1-S           |
| 175.0243 | 0.009%    | -1     | -2.70       | B1             |
| 191.0192 | 0.004%    | -1     | -2.84       | C1"            |
| 193.0349 | 0.105%    | -1     | -2.67       | C1             |
| 203.9968 | 0.097%    | -2     | 4.37        | 0,3X1-S-H      |
| 207.5209 | 0.007%    | -2     | -3.24       | B2             |
| 208.4672 | 0.027%    | -2     | -2.23       | Y1             |
| 216.5264 | 0.004%    | -2     | -2.10       | C2             |
| 222.4646 | 0.035%    | -2     | -2.09       | 1,5X1          |
| 247.4995 | 0.150%    | -2     | -1.83       | Z2-S           |
| 251.0090 | 0.421%    | -3     | -2.39       | Y3-S           |
| 251.4673 | 0.004%    | -2     | -2.22       | 3,5X1-2H;1,4X1 |
| 251.5292 | 0.101%    | -2     | -1.63       | 3,5A3          |
| 253.3517 | 0.020%    | -3     | -1.79       | 0,3A4          |
| 255.4970 | 0.017%    | -2     | -1.87       | Y2"-S          |
| 256.5048 | 0.149%    | -2     | -1.83       | Y2-S           |
| 257.6543 | 0.005%    | -3     | -2.12       | 2,4X2          |
| 260.3408 | 0.008%    | -3     | -1.68       | 1,5X3-S        |
| 263.0403 | 0.005%    | -1     | -2.10       | 0,3A2-2H       |
| 263.3551 | 0.025%    | -3     | -2.04       | 0,2A4-S        |
| 265.5267 | 0.006%    | -2     | -1.47       | 2,5A3-2H       |
| 270.5023 | 0.079%    | -2     | -1.69       | 1,5X2-S        |
| 271.6578 | 0.138%    | -3     | -2.22       | Z3             |
| 274.5319 | 0.012%    | -2     | -1.70       | 0,2A3          |
| 276.9896 | 0.077%    | -3     | -1.67       | Y3"            |
| 277.0560 | 0.404%    | -1     | -1.79       | 2,5A2-2H       |
| 277.6614 | 0.822%    | -3     | -1.80       | Y3             |
| 286.0233 | 0.010%    | -1     | -1.86       | 1,5X1-2S       |
| 286.4701 | 0.007%    | -2     | -1.75       | Z2"            |
| 286.9739 | 0.005%    | -2     | -2.09       | Z2'            |
| 286.9930 | 0.289%    | -3     | -2.04       | 1,5X3          |
| 287.4779 | 0.367%    | -2     | -1.74       | Z2             |
| 289.0195 | 0.004%    | -3     | -2.26       | M-H2O-CO2-SO3  |
| 290.0074 | 0.263%    | -3     | -1.76       | 0,2A4          |
| 291.3288 | 0.079%    | -3     | -2.21       | 0,2X3-H        |
| 291.5075 | 0.015%    | -2     | -1.62       | 1,4X2-S-2H     |
| 291.6648 | 0.049%    | -3     | -2.18       | 0,2X3          |
| 293.0510 | 0.004%    | -1     | -1.31       | 0,2A2-2H       |



|          |        |    |       |               |
|----------|--------|----|-------|---------------|
| 295.0333 | 0.008% | -2 | -1.35 | B3'           |
| 295.0665 | 0.130% | -1 | -1.92 | 0,2A2         |
| 295.4752 | 0.125% | -2 | -2.22 | Y2"           |
| 295.5371 | 0.131% | -2 | -1.92 | B3            |
| 296.4830 | 0.142% | -2 | -2.14 | Y2            |
| 300.9964 | 0.004% | -3 | -2.23 | 0,3X3-2H      |
| 303.0111 | 0.005% | -3 | -1.48 | M"-H2O-SO3    |
| 303.5346 | 0.041% | -2 | -1.73 | C3"           |
| 303.6831 | 1.807% | -3 | -1.17 | M-H2O-SO3     |
| 304.5424 | 5.283% | -2 | -1.79 | C3            |
| 309.0146 | 0.016% | -3 | -1.73 | M"-SO3        |
| 309.3508 | 0.013% | -3 | -0.74 | M'-SO3        |
| 309.6865 | 0.469% | -3 | -1.74 | M-SO3         |
| 310.4806 | 1.588% | -2 | -1.72 | 1,5X2         |
| 315.6719 | 0.075% | -3 | -1.71 | M-H2O-CO2     |
| 315.9886 | 0.018% | -2 | -1.62 | 0,2X2-S-2H    |
| 316.4924 | 0.207% | -2 | -2.07 | 0,2X2-S-H     |
| 317.9588 | 0.004% | -1 | -2.26 | Z1"-S         |
| 319.9746 | 0.014% | -1 | -1.86 | Z1-S          |
| 321.0036 | 0.025% | -3 | -1.57 | M"-CO2; 1,5A4 |
| 327.0259 | 0.006% | -2 | -2.14 | Z3"-2S        |
| 328.0338 | 0.126% | -2 | -1.78 | Z3-2S         |
| 329.9992 | 0.005% | -3 | -1.93 | M'-H2O        |
| 330.3352 | 0.026% | -3 | -1.50 | M-H2O         |
| 335.6668 | 0.016% | -3 | -1.79 | M"            |
| 336.0932 | 0.007% | -1 | -1.11 | B2-S          |
| 336.3388 | 0.733% | -3 | -1.49 | M             |
| 337.0391 | 0.017% | -2 | -1.81 | Y3-2S         |
| 337.9852 | 0.086% | -1 | -1.70 | Y1-S          |
| 351.0366 | 0.024% | -2 | -1.37 | 1,5X3-2S      |
| 352.0881 | 0.015% | -1 | -1.36 | C2"-S         |
| 354.1036 | 0.008% | -1 | -1.53 | C2-S          |
| 356.4708 | 0.946% | -2 | -1.94 | 0,2X2-H       |
| 365.9801 | 0.028% | -1 | -1.52 | 1,5X1-S       |
| 367.0044 | 0.064% | -2 | -1.50 | Z3"-S         |
| 368.0123 | 0.065% | -2 | -1.41 | Z3-S          |
| 372.5335 | 0.004% | -2 | -2.42 | 3,5A4         |
| 376.0096 | 0.010% | -2 | -1.65 | Y3"-S         |
| 376.7099 | 0.009% | -3 | -1.51 | M'-SO3+A      |
| 377.0175 | 0.078% | -2 | -1.63 | Y3-S          |
| 377.0452 | 0.006% | -3 | -3.16 | M-SO3+A       |
| 378.9877 | 0.008% | -1 | -2.02 | 0,2X1-S-H     |
| 379.9961 | 0.004% | -1 | -0.53 | 0,2X1-S       |

|          |        |    |       |                     |
|----------|--------|----|-------|---------------------|
| 380.0285 | 0.004% | -2 | 1.44  | 0,3A4-H             |
| 386.0396 | 0.005% | -1 | -0.78 | 1,5A2-2H            |
| 386.5307 | 0.005% | -2 | -3.09 | 2,5A4-S-2H          |
| 388.0547 | 0.005% | -1 | -2.10 | 1,5A2               |
| 391.0151 | 0.051% | -2 | -1.00 | 1,5X3-S             |
| 395.5366 | 0.046% | -2 | -1.43 | 0,2A4-S             |
| 398.0233 | 0.005% | -2 | -0.08 | 0,2X3-S             |
| 406.9828 | 0.026% | -2 | -1.48 | Z3"                 |
| 407.9906 | 0.054% | -1 | -1.50 | 0,3X1-S-H           |
| 407.9906 | 0.054% | -2 | -1.50 | Z3                  |
| 413.0282 | 0.007% | -2 | -1.03 | 0,3X3-S             |
| 414.0339 | 0.004% | -1 | -2.02 | B2"                 |
| 415.0419 | 0.024% | -1 | -1.65 | B2'                 |
| 415.9882 | 0.005% | -2 | -1.15 | Y3"                 |
| 416.0500 | 0.151% | -1 | -0.96 | B2                  |
| 416.9959 | 0.297% | -2 | -1.38 | Y3                  |
| 417.9419 | 0.011% | -1 | -1.64 | Y1                  |
| 430.9933 | 0.015% | -2 | -1.41 | 1,5X3               |
| 432.0447 | 0.042% | -1 | -1.46 | C2"                 |
| 433.0257 | 0.006% | -2 | -0.81 | M"-H2O-CO2-SO3      |
| 433.0530 | 0.006% | -1 | -0.48 | C2'                 |
| 434.0341 | 0.004% | -2 | 0.30  | M-H2O-CO2-SO3       |
| 434.0604 | 0.064% | -1 | -1.45 | C2                  |
| 438.0011 | 0.015% | -2 | -1.57 | 0,2X3               |
| 442.0307 | 0.039% | -2 | -1.44 | M"-CO2-SO3; 1,5A4-S |
| 445.9371 | 0.004% | -1 | -0.85 | 1,5X1               |
| 455.0204 | 0.013% | -2 | -1.30 | M"-H2O-SO3          |
| 456.0283 | 0.007% | -2 | -1.30 | M-H2O-SO3           |
| 464.0256 | 0.085% | -2 | -1.42 | M"-SO3              |
| 473.0037 | 0.004% | -2 | -1.65 | M"-H2O-CO2          |
| 482.0091 | 0.080% | -2 | -1.45 | M"-CO2; 1,5A4       |
| 496.0072 | 0.004% | -1 | 0.00  | Z2-S                |
| 496.0072 | 0.004% | -2 | 0.00  | M-H2O               |
| 504.0039 | 0.006% | -2 | -1.62 | M"                  |
| 592.0824 | 0.007% | -1 | -0.22 | B3                  |

Table S2. List of assigned peaks in the NETD spectrum of T2 [M - 4H]<sup>4+</sup>

| m/z      | Intensity | Charge | Error<br>(ppm) | Assignment |
|----------|-----------|--------|----------------|------------|
| 168.4891 | 0.180%    | -2     | -0.48          | Y1         |
| 175.0247 | 0.037%    | -1     | -0.46          | B1         |
| 191.0196 | 0.046%    | -1     | -0.61          | C1"        |
| 193.0353 | 0.086%    | -1     | -0.60          | C1         |
| 207.5215 | 0.079%    | -2     | -0.60          | Z2-S;B2-S  |
| 216.5267 | 0.050%    | -2     | -0.59          | Y1-S       |
| 220.9998 | 0.219%    | -3     | 3.46           | 0,3X2      |
| 233.5024 | 0.016%    | -2     | -0.65          | 1,5A2      |
| 238.0025 | 0.181%    | -1     | -0.65          | Z1"-S      |
| 239.0098 | 0.033%    | -1     | -3.17          | Z1'-S      |
| 240.0182 | 0.510%    | -1     | -0.69          | Z1-S       |
| 246.4920 | 0.073%    | -2     | -0.59          | Z2";B2"    |
| 246.9959 | 0.043%    | -2     | -0.71          | Z2';B2'    |
| 247.4999 | 0.243%    | -2     | -0.47          | Z2;B2      |
| 247.9539 | 0.042%    | -1     | -0.60          | 0,3X0      |
| 251.0093 | 0.233%    | -3     | -1.14          | Y3-S       |
| 255.4972 | 0.334%    | -2     | -0.86          | Y2";C2"    |
| 256.0131 | 0.089%    | -1     | -0.73          | Y1"-S      |
| 256.5051 | 5.878%    | -2     | -0.75          | Y2;C2      |
| 258.0287 | 0.093%    | -1     | -0.75          | Y1-S       |
| 260.3411 | 0.026%    | -3     | -0.49          | 1,5X3-S    |
| 265.0131 | 0.011%    | -3     | -0.06          | 0,2X3-S    |
| 270.5025 | 0.034%    | -2     | -0.85          | 1,5X2      |
| 276.9896 | 0.015%    | -3     | -1.38          | Y3"        |
| 277.6617 | 0.057%    | -3     | -0.87          | Y3         |
| 279.0052 | 0.011%    | -3     | 2.22           | 1,4A4-S-2H |
| 286.0236 | 0.109%    | -1     | -0.81          | 1,5X1-S    |
| 286.9932 | 0.279%    | -3     | -1.30          | 1,5X3      |
| 290.0077 | 0.035%    | -3     | -0.86          | 0,2A4      |
| 291.5078 | 0.389%    | -2     | -0.87          | 3,5A3      |
| 291.6652 | 0.029%    | -3     | -0.62          | 0,2X3      |
| 295.5375 | 0.023%    | -2     | -0.48          | B3-S       |
| 299.0320 | 0.043%    | -1     | 1.22           | 0,2X1-S-H  |
| 300.0392 | 0.044%    | -1     | -0.94          | 0,2X1-S    |
| 303.6832 | 0.112%    | -3     | -0.76          | M-H2O-SO3  |
| 304.5427 | 0.016%    | -2     | -0.82          | C3-S       |
| 305.5052 | 0.032%    | -2     | -0.78          | 2,5A3-2H   |

|          |        |    |       |              |
|----------|--------|----|-------|--------------|
| 309.0149 | 0.012% | -3 | -0.57 | M"-SO3       |
| 309.6867 | 0.309% | -3 | -0.79 | M-SO3        |
| 314.5106 | 0.017% | -2 | -0.55 | 0,2A3        |
| 315.3364 | 0.018% | -3 | -0.45 | M'-H2O-CO2   |
| 317.9593 | 0.011% | -1 | -0.63 | Z1"          |
| 318.9671 | 0.014% | -1 | -0.76 | Z1'          |
| 319.9749 | 0.047% | -1 | -0.85 | Z1           |
| 321.0039 | 0.067% | -3 | -0.75 | M"-CO2;1,5A4 |
| 321.3401 | 0.028% | -3 | 0.12  | M'-CO2       |
| 321.5183 | 0.054% | -2 | -0.81 | 1,5A3        |
| 327.0263 | 0.015% | -2 | -0.68 | Z3"-2S       |
| 328.0341 | 0.042% | -1 | -0.88 | 0,3X1-S-2H   |
| 328.0341 | 0.042% | -2 | -0.88 | Z3-2S        |
| 329.0181 | 0.050% | -1 | -0.83 | 3,5A2        |
| 330.3355 | 0.023% | -3 | -0.60 | M-H2O        |
| 332.0030 | 0.058% | -2 | 2.45  | 0,3X2        |
| 334.5079 | 0.017% | -2 | -0.98 | B3"          |
| 335.0119 | 0.064% | -2 | -0.65 | B3'          |
| 335.5158 | 0.356% | -2 | -0.63 | B3           |
| 335.6672 | 0.020% | -3 | -0.40 | M"           |
| 335.9698 | 0.059% | -1 | -0.74 | Y1"          |
| 336.0031 | 0.046% | -3 | -0.53 | M'           |
| 336.3391 | 0.691% | -3 | -0.59 | M            |
| 336.9777 | 0.082% | -1 | -0.73 | Y1'          |
| 337.0394 | 0.015% | -2 | -0.72 | Y3-2S        |
| 337.9856 | 0.286% | -1 | -0.45 | Y1           |
| 343.5132 | 0.079% | -2 | -0.89 | C3"          |
| 344.5212 | 0.159% | -2 | -0.43 | C3           |
| 357.0131 | 0.012% | -1 | -0.64 | 2,5A2-2H     |
| 359.0285 | 0.011% | -1 | -1.33 | 2,5A2        |
| 365.9804 | 0.292% | -1 | -0.72 | 1,5X1        |
| 368.0126 | 0.036% | -2 | -0.65 | Z3-S         |
| 372.5339 | 0.013% | -2 | -1.44 | 3,5A4-S      |
| 375.0236 | 0.272% | -1 | -0.80 | 0,2A2        |
| 376.0102 | 0.019% | -2 | -0.20 | Y3"-S        |
| 376.7102 | 0.025% | -3 | -0.73 | M'-SO3+A     |
| 377.0176 | 0.035% | -2 | -1.14 | Y3-S         |
| 377.0462 | 0.026% | -3 | -0.66 | M-SO3+A      |
| 378.9882 | 0.079% | -1 | -0.75 | 0,2X1-H      |
| 379.9960 | 0.306% | -1 | -0.68 | 0,2X1        |
| 380.0290 | 0.073% | -2 | 2.78  | 0,3A4-H      |

|          |        |    |       |                    |
|----------|--------|----|-------|--------------------|
| 386.0398 | 0.062% | -1 | -0.18 | 1,5A2-S-2H         |
| 388.0552 | 0.138% | -1 | -0.78 | 1,5A2-S            |
| 391.0152 | 0.181% | -2 | -0.77 | 1,5X3-S            |
| 395.5369 | 0.169% | -2 | -0.77 | 0,2A4-S            |
| 397.5192 | 0.037% | -2 | -0.56 | 0,2X3-H            |
| 405.5048 | 0.020% | -2 | -0.43 | 2,4A4              |
| 407.9909 | 0.026% | -1 | -0.76 | 0,3X1-2H           |
| 407.9909 | 0.026% | -2 | -0.76 | Z3                 |
| 414.0343 | 0.166% | -1 | -1.17 | Z2"-S;B2"-S        |
| 415.0423 | 0.116% | -1 | -0.67 | Z2'-S;B2'-S        |
| 415.9882 | 0.032% | -2 | -1.15 | Y3"                |
| 416.0501 | 1.550% | -1 | -0.70 | Z2-S;B2-S          |
| 416.9962 | 0.033% | -2 | -0.77 | Y3                 |
| 420.0169 | 0.014% | -2 | -3.38 | 3,5X3-S-2H;1,4X3-S |
| 423.9857 | 0.022% | -1 | -0.95 | 3,5X1-2H; 1,4X1    |
| 430.9936 | 0.136% | -2 | -0.76 | 1,5X3              |
| 432.0450 | 3.317% | -1 | -0.82 | Y2"-S;C2"-S        |
| 434.0607 | 0.497% | -1 | -0.63 | Y2-S;C2-S          |
| 435.5152 | 0.091% | -2 | -0.80 | 0,2A4              |
| 437.4977 | 0.017% | -2 | -0.29 | 0,2X3-H            |
| 438.0016 | 0.019% | -2 | -0.39 | 0,2X3              |
| 442.0310 | 0.135% | -2 | -0.77 | M"-CO2-SO3;1,5A4-S |
| 451.9973 | 0.117% | -2 | -4.30 | 0,3X3-2H           |
| 452.0170 | 0.408% | -2 | -0.90 | M-H2O-2CO2         |
| 455.0207 | 0.034% | -2 | -0.64 | M"-H2O-SO3         |
| 455.5246 | 0.105% | -2 | -0.75 | M'-H2O-SO3         |
| 456.0285 | 0.071% | -2 | -0.74 | M-H2O-SO3          |
| 459.9963 | 0.044% | -2 | -0.80 | 1,4A4              |
| 462.0555 | 0.171% | -1 | -0.83 | 1,5X2-S            |
| 464.0259 | 0.125% | -2 | -0.81 | M"-SO3             |
| 465.0339 | 0.049% | -2 | -0.50 | M-SO3              |
| 465.9963 | 0.044% | -1 | -0.93 | 1,5A2-2H           |
| 467.0050 | 0.013% | -1 | 0.98  | 1,5A2-H            |
| 468.0118 | 0.135% | -1 | -1.19 | 1,5A2              |
| 473.0044 | 0.019% | -2 | -0.15 | M"-H2O-CO2         |
| 482.0095 | 0.028% | -2 | -0.51 | M"-CO2;1,5A4       |
| 493.9914 | 0.019% | -1 | -0.38 | Z2";B2"            |
| 494.9991 | 0.107% | -2 | -0.72 | M"-H2O             |
| 494.9991 | 0.107% | -1 | -0.72 | Z2';B2'            |
| 496.0069 | 1.049% | -2 | -0.79 | M-H2O              |
| 496.0069 | 1.049% | -1 | -0.79 | Z2;B2              |

|          |        |    |       |            |
|----------|--------|----|-------|------------|
| 504.0660 | 0.082% | -1 | -0.93 | 3,5A3-S    |
| 505.0123 | 0.025% | -2 | -0.52 | M          |
| 512.0017 | 1.168% | -1 | -0.87 | Y2";C2"    |
| 514.0175 | 0.481% | -1 | -0.61 | Y2;C2      |
| 532.0610 | 0.019% | -1 | -0.68 | 2,5A3-S-2H |
| 542.0123 | 0.234% | -1 | -0.82 | 1,5X2      |
| 550.0715 | 0.120% | -1 | -0.78 | 0,2A3-S    |
| 554.0361 | 0.033% | -1 | -0.71 | 0,2X2-S-H  |
| 564.0872 | 0.020% | -1 | -0.78 | 1,5A3-S    |
| 565.0651 | 0.020% | -2 | -0.60 | M"-SO3+A   |
| 565.5683 | 0.022% | -2 | -1.81 | M'-SO3+A   |
| 584.0230 | 0.046% | -1 | -0.49 | 3,5A3      |
| 590.0664 | 0.061% | -1 | -0.74 | B3"-S      |
| 591.0744 | 0.251% | -1 | -0.45 | B3'-S      |
| 592.0823 | 0.382% | -1 | -0.44 | B3-S       |
| 608.0770 | 0.264% | -1 | -0.65 | C3"-S      |
| 610.0926 | 0.182% | -1 | -0.75 | C3-S       |
| 630.0283 | 0.055% | -1 | -0.81 | 0,2A3      |
| 633.9931 | 0.024% | -1 | -0.47 | 0,2X2-H    |
| 655.0600 | 0.011% | -1 | -0.63 | Z3"-2S     |
| 670.0234 | 0.028% | -1 | -0.48 | B3"        |
| 671.0312 | 0.104% | -1 | -0.43 | B3'        |
| 672.0390 | 0.491% | -1 | -0.51 | B3         |
| 688.0337 | 0.124% | -1 | -0.76 | C3"        |
| 690.0498 | 0.042% | -1 | -0.11 | C3         |

Table S3. List of assigned peaks in the NETD spectrum of T3 [M - 4H]<sup>4+</sup>

| m/z      | Intensity | Charge | Error (ppm) |            |
|----------|-----------|--------|-------------|------------|
| 191.0192 | 0.010%    | -1     | -2.85       | C1''       |
| 193.0349 | 0.055%    | -1     | -2.72       | C1         |
| 203.9968 | 0.117%    | -2     | 4.42        | 0,3X1-2S-H |
| 207.5211 | 0.122%    | -2     | -2.08       | B2         |
| 208.4671 | 0.027%    | -2     | -2.56       | Y1         |
| 220.9994 | 0.016%    | -3     | 1.55        | 0,3X2-2S   |
| 222.4646 | 0.018%    | -2     | -2.42       | 1,5X1      |
| 223.9717 | 0.231%    | -3     | -2.55       | Y2         |
| 229.3446 | 0.011%    | -3     | -2.30       | C3         |
| 240.0178 | 0.013%    | -1     | -2.12       | Z1-2S      |
| 247.4994 | 0.021%    | -2     | -2.27       | Z2-2S      |
| 247.9539 | 0.001%    | -1     | -0.40       | 0,3X0      |
| 255.4969 | 0.013%    | -2     | -2.23       | Y2''-2S    |
| 256.5047 | 0.029%    | -2     | -2.11       | Y2-2S      |
| 268.9469 | 0.011%    | -2     | -1.97       | 0,2X1-H    |
| 270.5021 | 0.012%    | -2     | -2.14       | 1,5X2-2S   |
| 270.9869 | 0.032%    | -3     | 1.53        | Z3''-S     |
| 271.6578 | 0.090%    | -3     | -2.08       | Z3-S       |
| 274.5318 | 0.090%    | -2     | -2.04       | 0,2A3      |
| 274.6726 | 0.013%    | -3     | -0.61       | 3,5A4      |
| 277.0558 | 0.264%    | -1     | -2.68       | 2,5A2-2H   |
| 277.6613 | 0.050%    | -3     | -2.02       | Y3-S       |
| 283.9535 | 0.138%    | -2     | 2.72        | 0,3X1-H    |
| 284.4560 | 0.007%    | -2     | -2.05       | 0,3X1      |
| 286.4700 | 0.009%    | -2     | -1.83       | Z2-S       |
| 286.9737 | 0.007%    | -2     | -2.78       | Z2'-S      |
| 286.9930 | 0.034%    | -3     | -2.05       | 1,5X3-S    |
| 287.4780 | 0.095%    | -2     | -1.50       | Z2-S       |
| 290.0076 | 0.008%    | -3     | -1.26       | 0,2A4-S    |
| 291.3289 | 0.010%    | -3     | -2.03       | 0,2X3-S-H  |
| 292.4534 | 0.011%    | -2     | -2.23       | 3,5X1      |
| 295.0665 | 0.248%    | -1     | -2.02       | 0,2A2      |
| 295.4752 | 0.180%    | -2     | -2.10       | Y2''-S     |
| 295.5370 | 0.056%    | -2     | -2.05       | B3-S       |
| 296.4831 | 0.616%    | -2     | -2.05       | Y2-S       |
| 297.6382 | 0.007%    | -3     | -1.79       | Z3''       |
| 298.3102 | 0.132%    | -3     | -1.43       | Z3         |
| 303.5345 | 0.014%    | -2     | -1.96       | C3''-S     |
| 303.6417 | 0.052%    | -3     | -1.96       | Y3''       |
| 303.9779 | 0.013%    | -3     | -1.04       | Y3'        |

|          |        |    |       |                     |
|----------|--------|----|-------|---------------------|
| 304.3137 | 0.795% | -3 | -1.56 | Y3                  |
| 304.5423 | 0.089% | -2 | -2.02 | C3-S                |
| 310.4805 | 0.350% | -2 | -1.99 | 1,5X2-S             |
| 313.6454 | 0.302% | -3 | -1.38 | 1,5X3               |
| 315.6718 | 0.014% | -3 | -2.16 | M-H2O-CO2-SO3       |
| 316.4925 | 0.013% | -2 | -1.59 | 0,2X2-2S-H          |
| 316.6597 | 0.013% | -3 | -1.76 | 0,2A4               |
| 317.9589 | 0.033% | -1 | -1.98 | Z1"-S               |
| 317.9811 | 0.116% | -3 | -1.89 | 0,2X3-H             |
| 318.3176 | 0.029% | -3 | -0.25 | 0,2X3               |
| 318.9666 | 0.009% | -1 | -2.26 | Z1'-S               |
| 319.9745 | 0.025% | -1 | -2.05 | Z1-S                |
| 321.0035 | 0.026% | -3 | -1.78 | M"-CO2-SO3; 1,5A4-S |
| 321.5179 | 0.018% | -2 | -1.99 | 1,5A3               |
| 327.4562 | 0.137% | -2 | -1.90 | Z2                  |
| 327.6486 | 0.011% | -3 | -2.10 | 0,3X3-2H            |
| 328.3206 | 0.009% | -3 | -1.93 | 0,3X3               |
| 329.6632 | 0.015% | -3 | -1.88 | M"-H2O-SO3          |
| 329.9993 | 0.015% | -3 | -1.60 | M'-H2O-SO3          |
| 330.3350 | 1.118% | -3 | -2.21 | M-H2O-SO3           |
| 332.0028 | 0.012% | -2 | 1.68  | 0,3X2-2S            |
| 334.5075 | 0.008% | -2 | -2.17 | B3"                 |
| 335.4538 | 0.102% | -2 | -1.43 | Y2"                 |
| 335.5154 | 0.112% | -2 | -1.79 | B3                  |
| 335.6669 | 0.103% | -3 | -1.37 | M"-SO3              |
| 335.9694 | 0.022% | -1 | -1.92 | Y1"-S               |
| 336.0030 | 0.022% | -3 | -0.95 | M'-SO3              |
| 336.0929 | 0.021% | -1 | -2.20 | B2-S                |
| 336.3388 | 0.810% | -3 | -1.31 | M-SO3               |
| 336.4615 | 0.313% | -2 | -1.82 | Y2                  |
| 337.9852 | 0.105% | -1 | -1.46 | Y1-S                |
| 341.6522 | 0.021% | -3 | -1.82 | M"-H2O-CO2          |
| 341.9883 | 0.018% | -3 | -1.53 | M'-H2O-CO2          |
| 342.3241 | 0.130% | -3 | -1.76 | M-H2O-CO2           |
| 343.5128 | 0.050% | -2 | -1.93 | C3"                 |
| 344.5207 | 1.443% | -2 | -1.87 | C3                  |
| 347.3199 | 0.014% | -3 | -1.66 | 1,5A4-H             |
| 347.6558 | 0.155% | -3 | -1.71 | M"-CO2; 1,5A4       |
| 347.9918 | 0.050% | -3 | -1.40 | M'-CO2              |
| 352.0879 | 0.031% | -1 | -1.80 | C2"-S               |
| 356.4708 | 0.397% | -2 | -1.74 | 0,2X2-S-H           |
| 356.6514 | 0.031% | -3 | -1.79 | M'-H2O              |
| 356.9875 | 0.025% | -3 | -1.40 | M-H2O               |



|          |        |    |       |                     |
|----------|--------|----|-------|---------------------|
| 362.3191 | 0.305% | -3 | -1.45 | M"                  |
| 362.6550 | 0.129% | -3 | -1.69 | M'                  |
| 362.9909 | 1.417% | -3 | -1.78 | M                   |
| 363.9644 | 0.008% | -1 | -1.63 | 1,5X1-S-2H          |
| 363.9644 | 0.008% | -2 | -1.63 | 2,5X2-S-2H          |
| 365.9801 | 0.174% | -1 | -1.50 | 1,5X1-S             |
| 367.0044 | 0.017% | -2 | -1.69 | Z3"-2S              |
| 368.0122 | 0.031% | -2 | -1.72 | Z3-2S               |
| 377.0174 | 0.009% | -2 | -1.93 | Y3-2S               |
| 378.9879 | 0.009% | -1 | -1.53 | 0,2X1-2S-H          |
| 380.0286 | 0.009% | -2 | 1.65  | 0,3A4-S-H           |
| 386.0395 | 0.009% | -1 | -0.97 | 1,5A2-2H            |
| 391.0148 | 0.024% | -2 | -1.77 | 1,5X3-2S            |
| 396.4492 | 0.473% | -2 | -1.72 | 0,2X2-H             |
| 399.9311 | 0.007% | -1 | -2.14 | Z1                  |
| 403.3619 | 0.040% | -3 | -2.02 | M'-SO3+A            |
| 403.6972 | 0.021% | -3 | -3.75 | M-SO3+A             |
| 405.5047 | 0.002% | -2 | -0.74 | 2,4A4               |
| 406.9827 | 0.045% | -2 | -1.69 | Z3"-S               |
| 407.9904 | 0.081% | -1 | -2.06 | 0,3X1-2S-2H         |
| 407.9904 | 0.081% | -2 | -2.06 | Z3-S                |
| 414.0341 | 0.029% | -1 | -1.69 | B2"                 |
| 415.0419 | 0.034% | -1 | -1.71 | B2'                 |
| 415.9907 | 0.015% | -2 | 4.97  | Y3"-S               |
| 416.0497 | 0.436% | -1 | -1.72 | B2                  |
| 416.9959 | 0.117% | -2 | -1.37 | Y3-S                |
| 417.9418 | 0.115% | -1 | -1.74 | Y1                  |
| 430.9932 | 0.063% | -2 | -1.83 | 1,5X3-S             |
| 432.0446 | 0.175% | -1 | -1.71 | C2"                 |
| 434.0603 | 0.088% | -1 | -1.72 | C2                  |
| 437.4969 | 0.010% | -2 | -2.11 | 0,2X3-S-H           |
| 445.9367 | 0.052% | -1 | -1.75 | 1,5X1               |
| 446.9610 | 0.027% | -2 | -1.73 | Z3"                 |
| 447.9687 | 0.066% | -2 | -2.09 | Z3                  |
| 453.0063 | 0.015% | -2 | -1.61 | 0,3X3-S             |
| 456.9739 | 0.194% | -2 | -2.07 | Y3                  |
| 461.0037 | 0.015% | -2 | -1.79 | 3,5X3-S             |
| 470.9716 | 0.028% | -2 | -1.63 | 1,5X3               |
| 473.0037 | 0.126% | -2 | -1.76 | M"-H2O-CO2-SO3      |
| 477.4756 | 0.008% | -2 | -1.30 | 0,2X3-H             |
| 477.9794 | 0.014% | -2 | -1.64 | 0,2X3               |
| 482.0088 | 0.119% | -2 | -2.06 | M"-CO2-SO3; 1,5A4-S |
| 493.9908 | 0.011% | -1 | -1.65 | Z2"-2S              |

|          |        |    |       |               |
|----------|--------|----|-------|---------------|
| 494.9986 | 0.102% | -2 | -1.72 | M"-H2O-SO3    |
| 496.0067 | 0.040% | -1 | -1.04 | Z2-2S         |
| 496.0067 | 0.040% | -2 | -1.04 | M-H2O-SO3     |
| 500.9820 | 0.009% | -2 | -1.91 | 3,5X3         |
| 504.0038 | 0.405% | -2 | -1.73 | M"-SO3        |
| 504.0656 | 0.075% | -1 | -1.82 | 3,5A3         |
| 512.0012 | 0.022% | -1 | -1.86 | Y2"-2S        |
| 512.9819 | 0.680% | -2 | -1.99 | M"-H2O-CO2    |
| 514.0166 | 0.014% | -1 | -2.36 | Y2-2S         |
| 514.9794 | 0.015% | -2 | -1.97 | 2,4X3         |
| 521.9874 | 0.106% | -2 | -1.57 | M"-CO2; 1,5A4 |
| 543.9819 | 0.008% | -2 | -2.29 | M"            |
| 590.0656 | 0.025% | -1 | -2.15 | B3"-S         |
| 592.0814 | 0.041% | -1 | -1.90 | B3-S          |
| 608.0762 | 0.035% | -1 | -1.96 | C3"-S         |
| 610.0919 | 0.012% | -1 | -1.89 | C3-S          |
| 672.0380 | 0.029% | -1 | -1.98 | B3            |
| 690.0479 | 0.008% | -1 | -2.91 | C3            |

Table S4. List of assigned peaks in the NETD spectrum of T3 [M - 5H]<sup>5-</sup>

| m/z      | Intensity | Charge | Error<br>(ppm) | Assignment |
|----------|-----------|--------|----------------|------------|
| 191.0196 | 0.030%    | -1     | -0.49          | C1"        |
| 193.0353 | 0.191%    | -1     | -0.43          | C1         |
| 206.6516 | 0.012%    | -3     | -0.48          | 1,5X2-S    |
| 207.4597 | 0.013%    | -2     | -0.39          | Z1"        |
| 207.5215 | 0.017%    | -2     | -0.33          | B2         |
| 208.4676 | 0.096%    | -2     | -0.38          | Y1         |
| 215.5189 | 0.056%    | -2     | -0.41          | C2"        |
| 216.5268 | 0.201%    | -2     | -0.43          | C2         |
| 217.2540 | 0.470%    | -4     | -0.49          | 0,2A4-S    |
| 217.9687 | 0.040%    | -3     | -0.46          | Z2         |
| 218.4972 | 0.068%    | -4     | -0.44          | 0,2X3-S    |
| 220.9996 | 0.065%    | -3     | 2.57           | 1,4A4-S    |
| 222.4650 | 0.128%    | -2     | -0.44          | 1,5X1      |
| 223.9722 | 0.156%    | -3     | -0.43          | Y2         |
| 228.6731 | 0.019%    | -3     | -0.51          | C3"        |
| 228.9689 | 0.077%    | -2     | -0.39          | 0,2X1-S-H  |
| 229.3449 | 0.500%    | -3     | -0.95          | C3         |
| 229.4728 | 0.013%    | -2     | -0.34          | 0,2X1-S    |
| 233.3038 | 0.820%    | -3     | -0.62          | 1,5X2      |
| 237.2433 | 0.018%    | -4     | -0.41          | 0,2A4      |
| 237.4703 | 0.020%    | -2     | -0.42          | 2,5X1      |
| 239.0104 | 0.014%    | -1     | -0.56          | Z1'-2S     |
| 240.0182 | 0.047%    | -1     | -0.44          | Z1-2S      |
| 246.4921 | 0.013%    | -2     | -0.37          | Z2"-2S     |
| 247.2479 | 0.029%    | -4     | -0.40          | M'-H2O-SO3 |
| 247.3485 | 0.013%    | -3     | -0.37          | 3,5A4-S-2H |
| 247.4999 | 0.199%    | -4     | -0.47          | M-H2O-SO3  |
| 247.9538 | 0.039%    | -1     | -0.81          | 0,3X0      |
| 249.0615 | 0.025%    | -1     | -0.39          | 3,5A2      |
| 251.4986 | 0.017%    | -4     | -0.45          | M"-SO3     |
| 251.5295 | 0.503%    | -2     | -0.58          | 3,5A3      |
| 252.0025 | 0.619%    | -4     | -0.51          | M-SO3      |
| 255.4973 | 0.016%    | -2     | -0.47          | Y2"-2S     |
| 256.4916 | 0.035%    | -4     | -0.54          | M-H2O-CO2  |
| 256.5051 | 0.079%    | -2     | -0.54          | Y2-2S      |
| 258.0288 | 0.018%    | -1     | -0.49          | Y1-2S      |
| 263.9640 | 0.054%    | -3     | -0.53          | 0,2X2-H    |

|          |        |    |       |                     |
|----------|--------|----|-------|---------------------|
| 265.5269 | 0.015% | -2 | -0.48 | 2,5A3-2H            |
| 267.2370 | 0.017% | -4 | -0.71 | M'-H2O              |
| 267.4891 | 0.044% | -4 | -0.26 | M-H2O               |
| 269.2956 | 0.058% | -3 | -0.54 | 2,5X2-H             |
| 270.5026 | 0.040% | -2 | -0.60 | 1,5X2-2S            |
| 271.4878 | 0.013% | -4 | -0.59 | M''                 |
| 271.6582 | 0.210% | -3 | -0.69 | Z3-S                |
| 271.9916 | 1.104% | -4 | -0.70 | M                   |
| 274.5322 | 0.047% | -2 | -0.68 | 0,2A3               |
| 277.0563 | 0.094% | -1 | -0.63 | 2,5A2-2H            |
| 277.6617 | 0.063% | -3 | -0.68 | Y3-S                |
| 280.5321 | 0.014% | -2 | -0.68 | 1,5A3-S-2H          |
| 283.9539 | 0.089% | -2 | 4.11  | 0,3X1-H             |
| 286.0237 | 0.027% | -1 | -0.55 | 1,5X1-2S            |
| 286.4704 | 0.016% | -2 | -0.62 | Z2''-S              |
| 286.9935 | 0.446% | -3 | 0.03  | 1,5X3-S             |
| 287.4782 | 0.082% | -2 | -0.58 | Z2-S                |
| 290.0078 | 0.216% | -3 | -0.60 | 0,2A4-S             |
| 292.0107 | 0.264% | -2 | -4.10 | 1,4X2-2S-H; 1,4A3-H |
| 295.0669 | 0.050% | -1 | -0.55 | 0,2A2               |
| 295.4757 | 0.194% | -2 | -0.59 | Y2''-S              |
| 295.5375 | 0.139% | -2 | -0.54 | B3-S                |
| 296.4834 | 0.314% | -2 | -0.95 | Y2-S                |
| 298.3104 | 0.383% | -3 | -0.85 | Z3                  |
| 303.5348 | 0.378% | -2 | -0.81 | C3''-S              |
| 304.3140 | 0.241% | -3 | -0.55 | Y3                  |
| 304.5426 | 0.213% | -2 | -1.10 | C3-S                |
| 306.0829 | 0.015% | -1 | -0.44 | 1,5A2-S-2H          |
| 309.4731 | 0.028% | -2 | -0.53 | 1,5X2-S-2H          |
| 310.4810 | 0.299% | -2 | -0.57 | 1,5X2-S             |
| 313.6456 | 0.505% | -3 | -0.65 | 1,5X3               |
| 315.0005 | 0.054% | -3 | -0.12 | M''-H2O-CO2-SO3     |
| 315.3351 | 0.016% | -3 | -4.66 | M'-H2O-CO2-SO3      |
| 315.9889 | 0.020% | -3 | 1.85  | 0,2A4-2H            |
| 315.9889 | 0.020% | -2 | -0.64 | 0,2X2-S-2H          |
| 316.6601 | 0.028% | -3 | -0.55 | 0,2A4               |
| 317.9593 | 0.131% | -1 | -0.60 | Z1''-S              |
| 317.9817 | 0.014% | -3 | -0.25 | 0,2X3-H             |
| 318.3176 | 0.036% | -3 | -0.22 | 0,2X3               |
| 319.9749 | 0.025% | -1 | -0.84 | Z1-S                |

|          |        |    |       |                     |
|----------|--------|----|-------|---------------------|
|          |        |    |       | M''-CO2-SO3; 1,5A4- |
| 321.0039 | 1.502% | -3 | -0.70 | S                   |
| 321.3385 | 0.408% | -3 | -4.80 | M'-CO2-SO3          |
| 321.5184 | 0.047% | -2 | -0.59 | 1,5A3               |
| 323.9864 | 0.028% | -2 | -0.53 | 2,5X2-2S-2H         |
| 327.4566 | 0.024% | -2 | -0.48 | Z2                  |
| 329.6637 | 0.184% | -3 | -0.57 | M''-H2O-SO3         |
| 330.0001 | 0.041% | -3 | 0.78  | M'-H2O-SO3          |
| 330.3348 | 0.061% | -3 | -2.73 | M-H2O-SO3           |
| 334.0778 | 0.021% | -1 | -0.54 | B2''-S              |
| 335.4541 | 0.070% | -2 | -0.56 | Y2''                |
| 335.5158 | 0.760% | -2 | -0.55 | B3                  |
| 335.6671 | 0.364% | -3 | -0.69 | M''-SO3             |
| 335.9699 | 0.099% | -1 | -0.56 | Y1''-S              |
| 336.0017 | 0.100% | -3 | -4.68 | M'-SO3              |
| 336.0934 | 0.045% | -1 | -0.60 | B2-S                |
| 336.4617 | 0.144% | -2 | -1.21 | Y2                  |
| 337.9856 | 0.070% | -1 | -0.42 | Y1-S                |
| 341.6527 | 0.123% | -3 | -0.55 | M''-H2O-CO2         |
| 341.9872 | 0.032% | -3 | -4.72 | M'-H2O-CO2          |
| 343.5133 | 0.073% | -2 | -0.55 | C3''                |
| 344.5211 | 0.690% | -2 | -0.62 | C3                  |
| 347.6562 | 3.995% | -3 | -0.54 | M''-CO2; 1,5A4      |
| 347.9907 | 1.081% | -3 | -4.52 | M'-CO2              |
| 350.4593 | 0.229% | -2 | -0.56 | 1,5X2               |
| 352.0883 | 0.112% | -1 | -0.56 | C2''-S              |
| 354.1039 | 0.018% | -1 | -0.78 | C2-S                |
| 355.9673 | 0.020% | -2 | -0.62 | 0,2X2-S-2H          |
| 356.4713 | 0.061% | -2 | -0.44 | 0,2X2-S-H           |
| 356.9878 | 0.024% | -3 | -0.66 | M-H2O               |
| 362.3194 | 0.039% | -3 | -0.68 | M''                 |
| 362.9913 | 0.024% | -3 | -0.57 | M                   |
| 363.9648 | 0.063% | -1 | -0.50 | 1,5X1-S-2H          |
| 363.9648 | 0.063% | -2 | -0.50 | 2,5X2-S-2H          |
| 364.9724 | 0.024% | -1 | -1.25 | 1,5X1-S-H           |
| 364.9724 | 0.024% | -2 | -1.25 | 2,5X2-S             |
| 365.0224 | 0.016% | -2 | -0.64 | 2,4A4-S-H           |
| 365.5264 | 0.082% | -2 | -0.47 | 2,4A4-S             |
| 365.9804 | 0.236% | -1 | -0.53 | 1,5X1-S             |
| 367.0048 | 0.067% | -2 | -0.59 | Z3''-2S             |
| 368.0126 | 0.022% | -2 | -0.50 | Z3-2S               |

|          |        |    |       |                     |
|----------|--------|----|-------|---------------------|
| 371.5264 | 0.013% | -2 | -0.47 | 3,5A4-S-2H          |
| 377.9804 | 0.022% | -1 | -0.63 | 0,2X1-2S-2H         |
| 378.9881 | 0.012% | -1 | -1.02 | 0,2X1-2S-H          |
| 379.5238 | 0.079% | -2 | -0.57 | 0,3A4-S-2H          |
| 380.0292 | 0.073% | -2 | 3.25  | 0,3A4-S-H           |
| 386.0401 | 0.063% | -1 | 0.57  | 1,5A2-2H            |
| 388.0553 | 0.034% | -1 | -0.57 | 1,5A2               |
| 391.0166 | 0.016% | -2 | 2.81  | 1,5X3-2S            |
| 396.4496 | 0.097% | -2 | -0.53 | 0,2X2-H             |
| 405.5048 | 0.060% | -2 | -0.56 | 2,4A4               |
| 406.9832 | 0.048% | -2 | -0.52 | Z3"-S               |
| 407.9910 | 0.059% | -2 | -0.54 | Z3-S                |
| 412.5126 | 0.027% | -2 | -0.46 | 3,5A4               |
| 414.0346 | 0.047% | -1 | -0.57 | B2"                 |
| 415.0424 | 0.564% | -1 | -0.55 | B2'                 |
| 416.0504 | 0.244% | -1 | -0.11 | B2                  |
| 416.9962 | 0.033% | -2 | -0.78 | Y3-S                |
| 417.9423 | 0.107% | -1 | -0.51 | Y1                  |
| 424.1096 | 0.016% | -1 | -0.23 | 3,5A3-S             |
| 427.0155 | 0.012% | -2 | 3.08  | 2,5A4-S-H           |
| 429.9859 | 0.017% | -2 | -0.45 | 1,5X3-S-2H          |
| 432.0451 | 0.206% | -1 | -0.63 | C2"                 |
| 434.0607 | 0.409% | -1 | -0.61 | C2                  |
| 438.0018 | 0.020% | -2 | 0.04  | 0,2X3-S             |
| 445.9371 | 0.051% | -1 | -0.69 | 1,5X1               |
| 447.9695 | 0.024% | -2 | -0.31 | Z3                  |
| 451.9991 | 0.020% | -2 | -0.30 | 0,3X3-S-2H          |
| 456.9747 | 0.022% | -2 | -0.48 | Y3                  |
| 458.9451 | 0.013% | -1 | -0.39 | 0,2X1-S-2H          |
| 459.9860 | 0.021% | -2 | 2.56  | 1,4A4-H             |
| 470.9721 | 0.022% | -2 | -0.55 | 1,5X3               |
| 473.0043 | 0.105% | -2 | -0.41 | M"-H2O-CO2-SO3      |
| 473.5063 | 0.029% | -2 | -4.52 | M'-H2O-CO2-SO3      |
| 477.4760 | 0.020% | -2 | -0.55 | 0,2X3-H             |
| 477.9802 | 0.019% | -2 | 0.12  | 0,2X3               |
| 481.0017 | 0.109% | -2 | -0.55 | 1,5A4-S-2H          |
| 481.5044 | 0.037% | -2 | -3.09 | 1,5A4-S-H           |
| 482.0096 | 0.124% | -2 | -0.38 | M"-CO2-SO3; 1,5A4-S |
| 482.5113 | 0.036% | -2 | -4.94 | M'-CO2-SO3          |
| 491.9772 | 0.022% | -2 | -0.92 | 0,3X3-2H            |

|          |        |    |       |                        |
|----------|--------|----|-------|------------------------|
| 493.9913 | 0.022% | -1 | -0.61 | Z2"-2S                 |
| 494.9994 | 0.020% | -1 | 0.05  | Z2'-2S                 |
| 494.9994 | 0.020% | -2 | 0.05  | M"-H2O-SO3             |
| 496.0071 | 0.079% | -1 | -0.31 | Z2-2S                  |
| 496.0071 | 0.079% | -2 | -0.31 | M-H2O-SO3              |
| 504.0045 | 0.042% | -2 | -0.37 | M"-SO3                 |
| 504.0662 | 0.204% | -1 | -0.59 | 3,5A3                  |
| 504.5061 | 0.014% | -2 | -4.95 | M'-SO3                 |
| 512.0020 | 0.021% | -1 | -0.31 | Y2"-2S                 |
| 512.9827 | 0.076% | -2 | -0.50 | M"-H2O-CO2             |
| 514.0176 | 0.035% | -1 | -0.38 | Y2-2S                  |
| 521.4840 | 0.026% | -2 | -0.54 | 1,5A4-H                |
| 521.9875 | 0.055% | -2 | -1.35 | M"-CO2; 1,5A4          |
| 522.4898 | 0.014% | -2 | -4.52 | M'-CO2                 |
| 539.9969 | 0.033% | -1 | -0.42 | 1,5X2-2S-2H            |
| 542.0125 | 0.029% | -1 | -0.51 | 1,5X2-2S               |
| 562.0716 | 0.021% | -1 | -0.62 | 1,5A3-S-2H             |
| 564.0874 | 0.026% | -1 | -0.43 | 1,5A3-S<br>M"-H2O-CO2- |
| 574.0423 | 0.027% | -2 | -2.35 | SO3+A                  |
| 575.9638 | 0.013% | -1 | -0.53 | Z2-S                   |
| 583.0463 | 0.013% | -2 | -4.54 | M"-CO2-SO3+A           |
| 590.0666 | 0.123% | -1 | -0.50 | B3"-S                  |
| 592.0822 | 0.598% | -1 | -0.46 | B3-S                   |
| 608.0771 | 0.148% | -1 | -0.55 | C3"-S                  |
| 610.0930 | 0.032% | -1 | -0.17 | C3-S                   |
| 644.0441 | 0.035% | -1 | -0.44 | 1,5A3                  |
| 672.0392 | 0.750% | -1 | -0.27 | B3                     |
| 690.0497 | 0.017% | -1 | -0.33 | C3                     |

Table S5. List of assigned peaks in the NETD spectrum of T3 [M - 5H + Na]<sup>4+</sup>

| m/z      | Intensity | Charge | Error (ppm) | Assignment  |
|----------|-----------|--------|-------------|-------------|
| 191.0198 | 0.013%    | -1     | 0.44        | C1''        |
| 193.0355 | 0.056%    | -1     | 0.45        | C1          |
| 207.5217 | 0.010%    | -2     | 0.43        | B2          |
| 219.4587 | 0.014%    | -2     | 0.34        | Y1+Na       |
| 229.3452 | 0.009%    | -3     | 0.25        | C3          |
| 231.2997 | 0.010%    | -3     | 0.30        | Y2+Na       |
| 238.0028 | 0.009%    | -1     | 0.49        | Z1''-2S     |
| 247.9542 | 0.002%    | -1     | 0.60        | 0,3X0       |
| 255.4975 | 0.017%    | -2     | 0.41        | Y2''-2S     |
| 256.5053 | 0.012%    | -2     | 0.14        | Y2-2S       |
| 271.2916 | 0.009%    | -3     | 0.40        | 0,2X2-H+Na  |
| 274.5324 | 0.001%    | -2     | 0.18        | 0,2A3       |
| 277.0566 | 0.496%    | -1     | 0.40        | 2,5A2-H     |
| 277.3249 | 0.009%    | -3     | -3.95       | Y3'-S       |
| 277.6620 | 0.710%    | -3     | 0.25        | Y3-S        |
| 279.0720 | 0.016%    | -1     | -0.41       | 2,5A2       |
| 280.0047 | 0.020%    | -3     | 0.98        | 0,3A4       |
| 283.9541 | 0.034%    | -2     | 4.98        | 0,3X1-H     |
| 284.9894 | 0.024%    | -3     | 0.54        | Y3-S+Na     |
| 294.3209 | 0.011%    | -3     | 0.26        | 1,5X3-S+Na  |
| 294.9439 | 0.016%    | -2     | 0.95        | 0,3X1-H+Na  |
| 295.0672 | 0.360%    | -1     | 0.39        | 0,2A2       |
| 295.4760 | 0.023%    | -2     | 0.53        | Y2''-S      |
| 295.5378 | 0.013%    | -2     | 0.64        | B3-S        |
| 296.4838 | 0.009%    | -2     | 0.32        | Y2-S        |
| 297.3354 | 0.013%    | -3     | 0.60        | 0,2A4-S+Na  |
| 298.4696 | 0.015%    | -2     | 0.64        | Z2-S+Na     |
| 299.0384 | 0.020%    | -1     | -0.03       | 2,5A2-2H+Na |
| 303.5352 | 0.010%    | -2     | 0.40        | C3''-S      |
| 304.5430 | 0.013%    | -2     | 0.47        | C3-S        |
| 304.9663 | 0.012%    | -3     | 0.63        | Z3''+Na     |
| 305.6383 | 0.272%    | -3     | 1.00        | Z3+Na       |
| 306.4670 | 0.181%    | -2     | 0.47        | Y2''-S+Na   |
| 307.4748 | 0.088%    | -2     | 0.57        | Y2-S+Na     |
| 310.4813 | 0.016%    | -2     | 0.61        | 1,5X2       |
| 310.9697 | 0.036%    | -3     | 0.41        | Y3''+Na     |
| 311.3061 | 0.013%    | -3     | 1.76        | Y3'+Na      |
| 311.6416 | 0.559%    | -3     | 0.43        | Y3+Na       |
| 313.6460 | 0.019%    | -3     | 0.50        | 1,5X3       |



|          |        |    |       |                   |
|----------|--------|----|-------|-------------------|
| 317.9596 | 0.011% | -1 | 0.39  | Z1"-S             |
| 320.9734 | 0.345% | -3 | 0.96  | 1,5X3+Na          |
| 321.4724 | 0.130% | -2 | 0.87  | 1,5X2-S+Na        |
| 323.9877 | 0.168% | -3 | 0.57  | 0,2A4+Na          |
| 323.9877 | 0.168% | -2 | 3.52  | 2,5X2-2S-2H       |
| 325.3093 | 0.056% | -3 | 0.64  | 0,2X3-H+Na        |
| 325.6457 | 0.014% | -3 | 2.20  | 0,2X3+Na          |
| 330.3050 | 0.016% | -3 | 0.63  | 2,5X3-2H+Na       |
| 335.4545 | 0.016% | -2 | 0.76  | Y2"               |
| 335.5163 | 0.076% | -2 | 0.73  | B3                |
| 337.6634 | 0.575% | -3 | 1.06  | M-H2O-SO3         |
| 337.9869 | 0.018% | -1 | 3.48  | Y1-S              |
| 338.4479 | 0.084% | -2 | 0.47  | Z2+Na             |
| 339.9416 | 0.010% | -1 | 0.49  | Z1"-S+Na          |
| 340.9495 | 0.012% | -1 | 0.73  | Z1'-S+Na          |
| 341.9573 | 0.011% | -1 | 0.67  | Z1-S+Na           |
| 343.6669 | 0.491% | -3 | 0.80  | M-SO3             |
| 344.5215 | 0.078% | -2 | 0.63  | C3                |
| 346.4455 | 0.100% | -2 | 0.69  | Y2"+Na            |
| 347.4529 | 0.103% | -2 | -0.34 | Y2+Na             |
| 349.3163 | 0.058% | -3 | 0.47  | M'-H2O-CO2        |
| 349.6524 | 0.027% | -3 | 0.94  | M-H2O-CO2         |
| 349.9814 | 0.013% | -2 | -4.13 | 3,5X2-2S-2H+Na    |
| 350.4598 | 0.059% | -2 | 0.68  | 1,5X2             |
| 352.0888 | 0.073% | -1 | 0.69  | C2"-S             |
| 354.5047 | 0.010% | -2 | 0.80  | C3"+Na            |
| 354.9839 | 0.194% | -3 | 0.62  | M"-CO2; 1,5A4+Na  |
| 355.3199 | 0.064% | -3 | 0.65  | M'-CO2            |
| 355.5124 | 0.405% | -2 | 0.45  | C3+Na             |
| 357.9523 | 0.043% | -1 | 0.67  | Y1"-S+Na          |
| 359.9681 | 0.016% | -1 | 1.27  | Y1-S+Na           |
| 361.4506 | 1.177% | -2 | 0.36  | 1,5X2+Na          |
| 363.9797 | 0.012% | -3 | 0.75  | M'-H2O            |
| 364.3157 | 0.018% | -3 | 0.94  | M-H2O             |
| 366.9587 | 0.023% | -2 | 0.55  | 0,2X2-S-2H+Na     |
| 367.4626 | 0.232% | -2 | 0.46  | 0,2X2-S-H+Na      |
| 367.9645 | 0.034% | -2 | -4.97 | 0,2X2-S+Na        |
| 369.6472 | 0.156% | -3 | 0.52  | M"                |
| 369.9832 | 0.076% | -3 | 0.79  | M'                |
| 370.3191 | 0.988% | -3 | 0.63  | M                 |
| 375.0241 | 0.015% | -3 | 0.18  | M"-H2O-2CO2-SO3+A |
| 377.0183 | 0.018% | -2 | 0.70  | Y3-2S             |
| 379.0040 | 0.022% | -2 | 0.56  | Z3-2S+Na          |

|          |        |    |       |                 |
|----------|--------|----|-------|-----------------|
| 387.9628 | 0.053% | -1 | 0.66  | 1,5X1-S+Na      |
| 396.4501 | 0.014% | -2 | 0.64  | 0,2X2-H         |
| 402.0069 | 0.014% | -2 | 1.09  | 1,5X3-2S+Na     |
| 407.4412 | 1.050% | -2 | 0.93  | 0,2X2-H+Na      |
| 407.9430 | 0.163% | -2 | -4.25 | 0,2X2+Na        |
| 410.6904 | 0.072% | -3 | 0.74  | M'-SO3+A        |
| 411.0253 | 0.040% | -3 | -1.62 | M-SO3+A         |
| 414.0350 | 0.021% | -1 | 0.54  | B2''            |
| 415.0429 | 0.024% | -1 | 0.71  | B2'             |
| 416.0507 | 0.187% | -1 | 0.76  | B2              |
| 416.9967 | 0.013% | -2 | 0.50  | Y3-S            |
| 417.9429 | 0.030% | -1 | 0.81  | Y1              |
| 417.9745 | 0.066% | -1 | 3.29  | 2,5X1-2S+Na     |
| 417.9745 | 0.066% | -2 | 0.42  | Z3''-S+Na       |
| 418.4762 | 0.012% | -2 | -4.98 | Z3'-S+Na        |
| 418.9825 | 0.092% | -2 | 0.67  | Z3-S+Na         |
| 423.5046 | 0.002% | -2 | 1.98  | 3,5A4+Na        |
| 426.9800 | 0.016% | -2 | 0.78  | Y3''-S+Na       |
| 427.9878 | 0.102% | -2 | 0.75  | Y3-S+Na         |
| 432.0456 | 0.161% | -1 | 0.62  | C2''            |
| 434.0613 | 0.073% | -1 | 0.70  | C2              |
| 439.9248 | 0.048% | -1 | 0.76  | Y1+Na           |
| 441.9851 | 0.139% | -2 | 0.33  | 1,5X3-S+Na      |
| 445.9378 | 0.016% | -1 | 0.81  | 1,5X1           |
| 446.5069 | 0.068% | -2 | 0.82  | 0,2A4-S+Na      |
| 448.4892 | 0.013% | -2 | 0.78  | 0,2X3-S-H+Na    |
| 454.0275 | 0.011% | -1 | 0.39  | C2''+Na         |
| 456.0432 | 0.009% | -1 | 0.67  | C2+Na           |
| 457.9531 | 0.120% | -2 | 0.72  | Z3''+Na         |
| 458.4566 | 0.036% | -2 | -0.12 | Z3'+Na          |
| 458.9610 | 0.182% | -2 | 0.89  | Z3+Na           |
| 463.9983 | 0.020% | -2 | 0.69  | 0,3X3-S+Na      |
| 466.9583 | 0.019% | -2 | 0.57  | Y3''+Na         |
| 467.9197 | 0.101% | -1 | 0.64  | 1,5X1+Na        |
| 467.9662 | 0.519% | -2 | 0.80  | Y3+Na           |
| 470.9880 | 0.030% | -2 | 0.65  | 1,4A4+Na        |
| 471.9959 | 0.014% | -2 | 0.99  | 3,5X3-S+Na      |
| 475.4948 | 0.019% | -2 | 1.73  | 0,2A4           |
| 481.9637 | 0.108% | -2 | 0.76  | 1,5X3+Na        |
| 483.9949 | 0.036% | -2 | -1.21 | M''-H2O-CO2-SO3 |
| 486.4853 | 0.027% | -2 | 0.74  | 0,2A4+Na        |
| 488.4676 | 0.016% | -2 | 0.82  | 0,2X3-H+Na      |
| 488.9716 | 0.036% | -2 | 0.84  | 0,2X3+Na        |

|          |        |    |       |                      |
|----------|--------|----|-------|----------------------|
| 493.0011 | 0.132% | -2 | 0.72  | M''-CO2-SO3; 1,5A4-S |
| 493.5028 | 0.037% | -2 | -3.72 | M'-CO2-SO3           |
| 495.0001 | 0.010% | -1 | 1.33  | Z2'-2S               |
| 496.0077 | 0.018% | -1 | 0.99  | Z2-2S                |
| 503.9771 | 0.012% | -2 | 1.33  | 0,3X3+Na             |
| 504.0668 | 0.118% | -1 | 0.61  | 3,5A3                |
| 505.9908 | 0.209% | -2 | 0.75  | M''-H2O-SO3          |
| 506.4935 | 0.082% | -2 | -1.53 | M'-H2O-SO3           |
| 506.9990 | 0.036% | -2 | 1.51  | M-H2O-SO3            |
| 511.9744 | 0.021% | -2 | 1.08  | 3,5X3+Na             |
| 514.0182 | 0.009% | -1 | 0.84  | Y2-2S                |
| 514.9961 | 0.605% | -2 | 0.79  | M''-SO3              |
| 515.4977 | 0.197% | -2 | -3.71 | M'-SO3               |
| 517.9895 | 0.023% | -1 | 0.53  | Z2-2S+Na             |
| 523.9742 | 0.279% | -2 | 0.64  | M''-H2O-CO2          |
| 524.4759 | 0.089% | -2 | -3.54 | M'-H2O-CO2           |
| 526.0487 | 0.011% | -1 | 0.54  | 3,5A3+Na             |
| 532.9795 | 0.374% | -2 | 0.69  | M''-CO2; 1,5A4+Na    |
| 533.4811 | 0.119% | -2 | -3.77 | M'-CO2               |
| 536.0003 | 0.010% | -1 | 1.00  | Y2-2S+Na             |
| 554.9745 | 0.021% | -2 | 0.71  | M''                  |
| 590.0673 | 0.034% | -1 | 0.79  | B3''-S               |
| 592.0832 | 0.031% | -1 | 1.10  | B3-S                 |
| 597.9465 | 0.015% | -1 | 0.76  | Z2-S+Na              |
| 608.0779 | 0.037% | -1 | 0.82  | C3''-S               |
| 610.0937 | 0.011% | -1 | 0.97  | C3-S                 |
| 616.0358 | 0.014% | -2 | 1.61  | M''-SO3+A            |
| 630.0601 | 0.024% | -1 | 1.09  | C3''-S+Na            |
| 643.9520 | 0.013% | -1 | 0.74  | 1,5X2-S+Na           |
| 654.9680 | 0.010% | -1 | 0.79  | 0,2X2-2S-2H+Na       |
| 664.0112 | 0.014% | -1 | 0.77  | 1,5A3-2H+Na          |
| 672.0401 | 0.053% | -1 | 1.16  | B3                   |
| 694.0222 | 0.038% | -1 | 1.35  | B3+Na                |
| 710.0171 | 0.015% | -1 | 1.22  | C3''+Na              |

Table S6. List of assigned peaks in the NETD spectrum of T4 [M - 4H]<sup>4+</sup>

| m/z      | Intensity | Charge | Error<br>(ppm) | Assignment      |
|----------|-----------|--------|----------------|-----------------|
| 174.0169 | 0.013%    | -1     | -0.48          | B1'             |
| 191.0196 | 0.026%    | -1     | -0.62          | C1''            |
| 193.0353 | 0.015%    | -1     | -0.56          | C1              |
| 208.4675 | 0.121%    | -2     | -0.51          | Y1              |
| 220.9998 | 0.047%    | -3     | 3.47           | 0,3X2-S         |
| 222.4650 | 0.472%    | -2     | -0.62          | 1,5X1           |
| 228.9689 | 0.075%    | -2     | -0.50          | 0,2X1-H         |
| 238.0025 | 0.120%    | -1     | -0.62          | Z1''-2S         |
| 239.0103 | 0.013%    | -1     | -0.92          | Z1'-2S          |
| 240.0182 | 0.031%    | -1     | -0.66          | Z1-2S           |
| 246.4920 | 0.098%    | -2     | -0.61          | B2''            |
| 246.9958 | 0.014%    | -2     | -1.03          | B2'             |
| 247.4998 | 0.050%    | -2     | -0.62          | B2              |
| 247.9539 | 0.029%    | -1     | -0.40          | 0,3X0           |
| 251.4677 | 0.014%    | -2     | -0.53          | 1,4X1; 3,5X1-2H |
| 255.4973 | 0.548%    | -2     | -0.68          | C2''            |
| 256.0130 | 0.014%    | -1     | -0.85          | Y1''-2S         |
| 256.5051 | 0.937%    | -2     | -0.79          | C2              |
| 270.5026 | 0.036%    | -2     | -0.64          | 1,5X2-S         |
| 284.0080 | 0.016%    | -1     | -0.61          | 1,5X1-2S-2H     |
| 284.0080 | 0.016%    | -2     | -0.61          | 2,5X2-2S-2H     |
| 286.4703 | 0.091%    | -2     | -0.79          | Z2''            |
| 286.9743 | 0.135%    | -2     | -0.77          | Z2'             |
| 286.9933 | 0.022%    | -3     | -0.81          | 1,5X3-S         |
| 287.4782 | 0.825%    | -2     | -0.60          | Z2              |
| 290.5000 | 0.019%    | -2     | -0.73          | 3,5A3-2H        |
| 291.5078 | 0.557%    | -2     | -0.63          | 3,5A3           |
| 295.4757 | 3.011%    | -2     | -0.62          | Y2''            |
| 296.4832 | 0.772%    | -2     | -1.57          | Y2              |
| 299.5052 | 0.032%    | -2     | -0.80          | 0,3A3           |
| 303.9771 | 0.017%    | -3     | -3.59          | Y3'             |
| 304.3140 | 0.075%    | -3     | -0.64          | Y3              |
| 305.5052 | 0.054%    | -2     | -0.78          | 2,5A3-2H        |
| 310.4810 | 0.395%    | -2     | -0.30          | 1,5X2           |
| 313.6456 | 0.404%    | -3     | -0.76          | 1,5X3           |
| 314.5105 | 0.074%    | -2     | -0.71          | 0,2A3           |
| 316.4928 | 0.021%    | -2     | -0.67          | 0,2X2-S-H       |
| 317.9593 | 0.131%    | -1     | -0.74          | Z1''-S          |
| 318.3176 | 0.014%    | -3     | -0.19          | 0,2X3           |

|          |        |    |       |                |
|----------|--------|----|-------|----------------|
| 318.9671 | 0.052% | -1 | -0.59 | Z1'            |
| 319.9749 | 0.076% | -1 | -0.69 | Z1-S           |
| 321.5184 | 0.023% | -2 | -0.63 | 1,5A3          |
| 322.9772 | 0.019% | -3 | -0.64 | 2,5X3-2H       |
| 323.9864 | 0.023% | -2 | -0.53 | 2,5X2-S-2H     |
| 327.6491 | 0.039% | -3 | -0.84 | 0,3X3-2H       |
| 328.0103 | 0.013% | -1 | -0.99 | 3,5A4-H        |
| 328.0342 | 0.016% | -1 | -0.49 | 0,3X1-2S-2H    |
| 329.0182 | 0.138% | -1 | -0.77 | 3,5A2          |
| 329.6635 | 0.015% | -3 | -1.00 | M"-H2O-SO3     |
| 329.9998 | 0.015% | -3 | 0.05  | M'-H2O-SO3     |
| 330.3355 | 0.130% | -3 | -0.58 | M-H2O-SO3      |
| 332.9806 | 0.039% | -3 | -0.97 | 1,4X3;3,5X3-2H |
| 334.5080 | 0.158% | -2 | -0.66 | B3"            |
| 335.0117 | 0.160% | -2 | -1.31 | B3'            |
| 335.5144 | 0.049% | -2 | -4.88 | B3             |
| 335.6673 | 0.041% | -3 | -0.14 | M"-SO3         |
| 335.9698 | 0.099% | -1 | -0.74 | Y1"-S          |
| 336.0035 | 0.014% | -3 | 0.49  | M'-SO3         |
| 336.3391 | 0.617% | -3 | -0.57 | M-SO3          |
| 337.9854 | 0.371% | -1 | -0.85 | Y1-S           |
| 341.6526 | 0.025% | -3 | -0.69 | M"-H2O-CO2     |
| 341.9889 | 0.013% | -3 | 0.19  | M'-H2O-CO2     |
| 343.5132 | 0.234% | -2 | -0.73 | C3"            |
| 344.5210 | 0.424% | -2 | -0.82 | C3             |
| 347.6561 | 0.032% | -3 | -0.65 | M"-CO2;1,5A4   |
| 347.9924 | 0.020% | -3 | 0.30  | M'-CO2         |
| 356.4710 | 0.187% | -2 | -1.21 | 0,2X2-H        |
| 356.6516 | 0.166% | -3 | -1.19 | M'-H2O         |
| 357.0131 | 0.037% | -1 | -0.61 | 2,5A2-2H       |
| 359.0287 | 0.086% | -1 | -0.71 | 2,5A2          |
| 362.3194 | 0.044% | -3 | -0.76 | M"             |
| 362.6554 | 0.054% | -3 | -0.40 | M'             |
| 362.9913 | 0.773% | -3 | -0.62 | M              |
| 363.9648 | 0.019% | -1 | -0.59 | 1,5X1-S-2H     |
| 363.9648 | 0.019% | -2 | -0.59 | 2,5X2-2H       |
| 365.9804 | 0.438% | -1 | -0.79 | 1,5X1-S        |
| 375.0236 | 0.411% | -1 | -0.75 | 0,2A2          |
| 377.0195 | 0.019% | -2 | 3.83  | Y3-2S          |
| 377.9804 | 0.061% | -1 | -0.65 | 0,2X1-S-2H     |
| 378.9881 | 0.154% | -1 | -0.84 | 0,2X1-S-H      |
| 379.9957 | 0.020% | -1 | -1.67 | 0,2X1-S        |
| 380.0290 | 0.023% | -2 | 2.60  | 0,3A4-S-H      |

|          |        |    |       |                     |
|----------|--------|----|-------|---------------------|
| 386.0399 | 0.029% | -1 | 0.08  | 1,5A2-S-2H          |
| 387.0473 | 0.012% | -1 | -0.94 | 1,5A2-S-H           |
| 388.0553 | 0.015% | -1 | -0.58 | 1,5A2-S             |
| 391.0152 | 0.018% | -2 | -0.76 | 1,5X3-2S            |
| 399.9317 | 0.073% | -1 | -0.67 | Z1                  |
| 403.3625 | 0.097% | -3 | -0.67 | M'-SO3+A            |
| 403.6972 | 0.055% | -3 | -3.59 | M-SO3+A             |
| 406.9831 | 0.071% | -2 | -0.78 | Z3"-S               |
| 407.9909 | 0.153% | -1 | -0.74 | 0,3X1-S-2H          |
| 407.9909 | 0.153% | -2 | -0.74 | Z3-S                |
| 412.5127 | 0.006% | -2 | -0.24 | 3,5A4               |
| 414.0345 | 0.131% | -1 | -0.68 | B2"-S               |
| 415.0423 | 0.120% | -1 | -0.65 | B2'-S               |
| 416.0502 | 1.374% | -1 | -0.68 | B2-S                |
| 416.9961 | 0.030% | -2 | -0.82 | Y3-S                |
| 417.9422 | 0.720% | -1 | -0.72 | Y1                  |
| 423.9857 | 0.027% | -1 | -0.99 | 1,4X1-S; 3,5X1-S-2H |
| 429.9860 | 0.014% | -2 | -0.29 | 1,5X3-S-2H          |
| 430.9936 | 0.231% | -2 | -0.81 | 1,5X3-S             |
| 432.0450 | 1.895% | -1 | -0.76 | C2"-S               |
| 434.0608 | 0.457% | -1 | -0.54 | C2-S                |
| 435.5153 | 0.027% | -2 | -0.68 | 0,2A4-S             |
| 436.9938 | 0.026% | -2 | -0.27 | 0,2X3-S-2H          |
| 437.4976 | 0.018% | -2 | -0.48 | 0,2X3-S-H           |
| 445.9371 | 0.565% | -1 | -0.73 | 1,5X1               |
| 447.4656 | 0.018% | -2 | -0.27 | Z3'                 |
| 447.9693 | 0.068% | -2 | -0.65 | Z3                  |
| 451.9983 | 0.017% | -2 | -2.08 | 0,3X3-S-2H          |
| 452.0171 | 0.117% | -2 | -0.74 | M-H2O-2CO2-SO3      |
| 455.9667 | 0.022% | -2 | -0.77 | Y3"                 |
| 456.9746 | 0.034% | -2 | -0.63 | Y3                  |
| 458.9449 | 0.272% | -1 | -0.79 | 0,2X1-H             |
| 459.9866 | 0.067% | -2 | 3.86  | 1,4A4-H             |
| 459.9964 | 0.067% | -2 | -0.65 | 1,4A4               |
| 462.0557 | 0.013% | -1 | -0.42 | 1,5X2-2S            |
| 465.9965 | 0.033% | -1 | -0.39 | 1,5A2-2H            |
| 467.0042 | 0.119% | -1 | -0.58 | 1,5A2-H             |
| 468.0128 | 0.023% | -1 | 0.96  | 1,5A2               |
| 470.9720 | 0.082% | -2 | -0.67 | 1,5X3               |
| 475.4939 | 0.004% | -2 | -0.21 | 0,2A4               |
| 481.0017 | 0.023% | -2 | -0.49 | 1,5A4-S-2H          |
| 482.0095 | 0.083% | -2 | -0.71 | M"-CO2-SO3;1,5A4-S  |

|          |        |    |       |             |
|----------|--------|----|-------|-------------|
| 492.9835 | 0.031% | -2 | -4.04 | 0,3X3       |
| 493.9913 | 0.113% | -1 | -0.60 | B2"         |
| 494.9992 | 1.194% | -1 | -0.45 | B2'         |
| 494.9992 | 1.194% | -2 | -0.45 | M"-H2O-SO3  |
| 496.0077 | 0.397% | -1 | 0.85  | B2          |
| 496.0077 | 0.397% | -2 | 0.85  | M-H2O-SO3   |
| 502.0506 | 0.026% | -1 | -0.39 | 3,5A3-S-2H  |
| 504.0045 | 0.584% | -2 | -0.47 | M"-SO3      |
| 504.0661 | 0.135% | -1 | -0.80 | 3,5A3-S     |
| 505.0125 | 0.059% | -2 | -0.02 | M-SO3       |
| 512.0018 | 0.566% | -1 | -0.79 | C2"         |
| 514.0175 | 0.768% | -1 | -0.66 | C2          |
| 520.0610 | 0.017% | -1 | -0.76 | 0,3A3-S     |
| 522.9942 | 0.014% | -2 | -3.49 | M-CO2       |
| 539.9970 | 0.014% | -1 | -0.10 | 1,5X2-S-2H  |
| 542.0124 | 0.092% | -1 | -0.68 | 1,5X2-S     |
| 550.0717 | 0.026% | -1 | -0.47 | 0,2A3-S     |
| 553.0283 | 0.038% | -1 | -0.69 | 0,2X2-2S-2H |
| 562.0716 | 0.012% | -1 | -0.57 | 1,5A3-S-2H  |
| 569.0227 | 0.014% | -1 | -1.57 | 2,5X2-2S-2H |
| 574.9558 | 0.027% | -1 | -0.69 | Z2'         |
| 575.9639 | 0.065% | -1 | -0.36 | Z2          |
| 584.0229 | 0.119% | -1 | -0.66 | 3,5A3       |
| 590.0666 | 0.093% | -1 | -0.52 | B3"-S       |
| 591.0745 | 0.277% | -1 | -0.29 | B3'-S       |
| 591.9586 | 0.025% | -1 | -0.62 | Y2"         |
| 592.0827 | 0.193% | -1 | 0.22  | B3-S        |
| 593.9742 | 0.030% | -1 | -0.67 | Y2          |
| 605.0434 | 0.016% | -2 | -0.79 | M"-SO3+A    |
| 605.5469 | 0.031% | -2 | -1.43 | M'-SO3+A    |
| 606.0493 | 0.012% | -2 | -3.85 | M-SO3+A     |
| 608.0770 | 0.116% | -1 | -0.65 | C3"-S       |
| 610.0927 | 0.050% | -1 | -0.58 | C3-S        |
| 621.9689 | 0.039% | -1 | -1.00 | 1,5X2       |
| 630.0286 | 0.017% | -1 | -0.22 | 0,2A3       |
| 633.9929 | 0.015% | -1 | -0.69 | 0,2X2-S-H   |
| 648.9805 | 0.016% | -1 | 0.12  | 2,5X2-S-2H  |
| 670.0235 | 0.056% | -1 | -0.31 | B3"         |
| 671.0312 | 0.195% | -1 | -0.48 | B3'         |
| 672.0391 | 0.372% | -1 | -0.38 | B3          |
| 688.0340 | 0.045% | -1 | -0.41 | C3"         |
| 690.0496 | 0.142% | -1 | -0.41 | C3          |

Table S7. List of assigned peaks in the NETD spectrum of H1 [M - 5H]<sup>5-</sup>

| m/z      | Intensity | Charge | Error (ppm) | Assignment         |
|----------|-----------|--------|-------------|--------------------|
| 191.0190 | 0.024%    | -1     | -3.87       | C1"                |
| 193.0346 | 0.016%    | -1     | -3.92       | C1                 |
| 202.0278 | 0.023%    | -2     | -3.65       | Z1                 |
| 211.0330 | 0.014%    | -2     | -3.91       | Y1                 |
| 246.9953 | 0.049%    | -2     | -3.30       | B2'                |
| 246.9953 | 0.049%    | -4     | -3.30       | B4"                |
| 247.4992 | 0.079%    | -2     | -3.29       | B2                 |
| 247.4992 | 0.079%    | -4     | -3.29       | B4                 |
| 255.4966 | 0.166%    | -2     | -3.33       | C2"                |
| 256.5044 | 1.554%    | -2     | -3.29       | C2                 |
| 279.3718 | 0.049%    | -3     | -3.18       | Y3-S               |
| 291.5071 | 0.078%    | -2     | -3.11       | 3,5A3              |
| 291.5071 | 0.078%    | -4     | -3.11       | B5                 |
| 298.0411 | 0.021%    | -2     | -2.96       | Y2"                |
| 299.0487 | 0.138%    | -2     | -3.72       | Y2                 |
| 303.6825 | 0.032%    | -3     | -3.04       | B4-S               |
| 306.0240 | 0.122%    | -3     | -3.07       | Y3                 |
| 309.0141 | 0.015%    | -3     | -3.18       | C4"-S              |
| 312.0084 | 0.023%    | -4     | 4.36        | C5"-S              |
| 314.5098 | 0.015%    | -2     | -3.03       | 0,2A3              |
| 315.3556 | 0.047%    | -3     | -3.02       | 1,5X3              |
| 323.0909 | 0.062%    | -1     | -3.08       | Z1"-S              |
| 324.0987 | 0.017%    | -1     | -2.96       | Z1'-S              |
| 325.1065 | 0.093%    | -1     | -3.04       | Z1-S               |
| 329.0174 | 0.025%    | -1     | -2.94       | 3,5A2              |
| 329.9988 | 0.026%    | -3     | -3.02       | B4'                |
| 330.3349 | 0.048%    | -3     | -2.67       | B4                 |
| 333.0211 | 0.013%    | -3     | -3.29       | 3,5A5-S;1,4A5-S-2H |
| 334.5072 | 0.031%    | -2     | -3.07       | B3"                |
| 335.0111 | 0.054%    | -2     | -3.06       | B3'                |
| 335.5152 | 0.171%    | -2     | -2.58       | B3                 |
| 335.6664 | 0.107%    | -3     | -3.06       | C4"                |
| 338.0490 | 0.135%    | -3     | -3.05       | Y4-S               |
| 341.1014 | 0.074%    | -1     | -2.99       | Y1"-S              |
| 343.1171 | 0.047%    | -1     | -2.94       | Y1-S               |
| 343.5124 | 0.081%    | -2     | -3.02       | C3"                |
| 344.0345 | 0.022%    | -4     | 1.66        | 0,2X5-S            |



|          |        |    |       |                   |
|----------|--------|----|-------|-------------------|
| 344.5202 | 0.036% | -2 | -3.11 | C3                |
| 353.5195 | 0.020% | -4 | -3.02 | Y5                |
| 358.6977 | 0.142% | -3 | -3.02 | Z4                |
| 359.6733 | 0.226% | -3 | -3.03 | 3,5A5             |
| 360.5182 | 0.096% | -4 | -3.01 | 1,5X5             |
| 362.3598 | 0.026% | -3 | -2.85 | B5-S              |
| 364.0293 | 0.106% | -3 | -3.07 | Y4"               |
| 364.7012 | 0.278% | -3 | -2.95 | Y4                |
| 367.6913 | 0.027% | -3 | -3.05 | C5"-S             |
| 368.0282 | 0.019% | -3 | -0.45 | C5'-S             |
| 368.3632 | 0.018% | -3 | -3.24 | C5-S              |
| 370.5779 | 0.019% | -2 | -2.93 | Z3-2S             |
| 371.1119 | 0.044% | -1 | -2.96 | 1,5X1-S           |
| 371.5006 | 0.147% | -4 | -2.98 | M'-RE-H2O         |
| 372.5314 | 0.013% | -4 | -3.75 | M"-H2O-SO3        |
| 372.7836 | 0.024% | -4 | -2.98 | M'-H2O-SO3        |
| 373.0356 | 0.094% | -4 | -2.87 | M-H2O-SO3         |
| 374.0328 | 0.121% | -3 | -3.00 | 1,5X4             |
| 375.0227 | 0.092% | -1 | -3.05 | 0,2A2             |
| 375.7512 | 0.050% | -4 | -2.97 | M"-RE             |
| 377.0343 | 0.046% | -4 | -3.09 | M"-SO3            |
| 377.2859 | 0.023% | -4 | -3.99 | M'-SO3            |
| 377.5382 | 0.824% | -4 | -2.94 | M-SO3             |
| 379.6803 | 0.022% | -3 | -3.01 | 1,5A5             |
| 381.5234 | 0.064% | -4 | -2.99 | M"-H2O-CO2        |
| 386.0261 | 0.097% | -4 | -2.81 | M"-CO2            |
| 386.0384 | 0.046% | -1 | -3.69 | 1,5A2-S-2H        |
| 388.0544 | 0.039% | -1 | -2.96 | 1,5A2-S           |
| 388.6762 | 0.238% | -3 | -2.48 | B5'               |
| 392.5209 | 0.021% | -4 | -2.87 | M"-H2O            |
| 392.7728 | 0.123% | -4 | -2.88 | M'-H2O            |
| 394.3434 | 0.481% | -3 | -3.41 | C5"               |
| 395.0150 | 0.310% | -3 | -4.02 | C5                |
| 397.0235 | 0.386% | -4 | -2.80 | M"                |
| 397.2754 | 0.611% | -4 | -3.06 | M'                |
| 397.5274 | 2.864% | -4 | -2.98 | M                 |
| 400.0261 | 0.017% | -4 | -0.62 | M'-RE-H2O-2CO2+A  |
| 401.3096 | 0.014% | -4 | 0.50  | M'-H2O-2CO2-SO3+A |
| 401.5615 | 0.116% | -4 | 0.45  | M-H2O-2CO2-SO3+A  |
| 404.0553 | 0.035% | -1 | -2.94 | Z1'               |
| 404.6929 | 0.022% | -3 | -3.13 | 0,2X4-H           |

|          |        |    |       |              |
|----------|--------|----|-------|--------------|
| 405.0631 | 1.331% | -1 | -3.05 | Z1           |
| 409.5483 | 0.029% | -2 | -3.06 | Z3"-S        |
| 410.5563 | 0.205% | -2 | -2.56 | Z3-S         |
| 412.3873 | 0.020% | -3 | -2.73 | Z5-2S        |
| 414.0336 | 0.044% | -1 | -2.96 | B2"-S        |
| 414.5240 | 0.021% | -2 | -3.03 | 0,3X2        |
| 415.0414 | 0.065% | -1 | -3.02 | B2'-S        |
| 415.0414 | 0.065% | -2 | -3.02 | B4"-2S       |
| 416.0490 | 1.013% | -1 | -3.51 | B2-S         |
| 416.0490 | 1.013% | -2 | -3.51 | B4-2S        |
| 418.5537 | 0.028% | -2 | -2.75 | Y3"-S        |
| 419.5614 | 0.082% | -2 | -2.99 | Y3-S         |
| 423.0736 | 0.089% | -1 | -3.04 | Y1           |
| 424.0466 | 0.033% | -2 | -3.02 | C4"-2S       |
| 425.0577 | 0.078% | -2 | 4.60  | C4-2S        |
| 427.7223 | 0.032% | -3 | -2.94 | 1,5X5-2S     |
| 427.8057 | 0.273% | -4 | -2.98 | M'-SO3+A     |
| 432.0440 | 1.045% | -1 | -3.02 | C2"-S        |
| 432.0440 | 1.045% | -4 | -0.12 | M"-H2O-CO2+A |
| 433.5588 | 0.078% | -2 | -3.08 | 1,5X3-S      |
| 434.0597 | 0.108% | -1 | -3.06 | C2-S         |
| 435.5143 | 0.020% | -2 | -2.97 | 0,2A4        |
| 438.7037 | 0.014% | -3 | -2.44 | Z5'-S        |
| 439.0391 | 0.211% | -3 | -3.50 | Z5-S         |
| 440.3430 | 0.027% | -3 | -2.91 | 3,5A6        |
| 444.3709 | 0.016% | -3 | -3.15 | Y5"-S        |
| 447.7948 | 0.084% | -4 | -2.98 | M'+A         |
| 450.3465 | 0.014% | -3 | -3.01 | 2,5A6        |
| 450.5344 | 0.050% | -2 | -3.04 | Z3           |
| 451.0684 | 0.117% | -1 | -3.06 | 1,5X1        |
| 454.3744 | 0.311% | -3 | -3.04 | 1,5X5-S      |
| 455.0197 | 0.041% | -2 | -2.82 | B4"-S        |
| 455.5238 | 0.036% | -2 | -2.41 | B4'-S        |
| 455.6780 | 0.037% | -3 | -3.26 | 0,2A6        |
| 456.0277 | 0.038% | -2 | -2.48 | B4-S         |
| 458.5318 | 0.019% | -2 | -3.13 | Y3"          |
| 458.7104 | 0.095% | -3 | -3.02 | 0,2X5-S-H    |
| 459.5399 | 0.278% | -2 | -2.59 | Y3           |
| 463.7060 | 0.035% | -3 | -3.05 | 2,5X5-S-2H   |
| 464.0249 | 0.128% | -2 | -3.03 | C4"-S        |
| 465.0323 | 0.023% | -2 | -3.82 | C4-S         |

|          |        |    |       |                    |
|----------|--------|----|-------|--------------------|
| 465.6916 | 0.023% | -3 | -2.80 | Z5                 |
| 468.3779 | 0.024% | -3 | -3.03 | 0,3X5-S-2H         |
| 468.6817 | 0.033% | -3 | -3.02 | M"-RE-H2O-SO3      |
| 469.3537 | 0.785% | -3 | -2.65 | M-RE-H2O-SO3       |
| 471.0233 | 0.023% | -3 | -2.77 | Y5"                |
| 471.3589 | 0.014% | -3 | -3.51 | Y5'                |
| 471.6950 | 0.044% | -3 | -2.99 | Y5                 |
| 473.5369 | 0.479% | -2 | -3.44 | 1,5X3              |
| 473.7095 | 0.018% | -3 | -3.17 | 1,4X5-S;3,5X5-S-2H |
| 474.6852 | 0.044% | -3 | -3.00 | M"-RE-SO3          |
| 476.0709 | 0.031% | -1 | -1.47 | 2,4A3-S            |
| 477.0642 | 0.039% | -2 | -0.08 | 2,4X3-S-H          |
| 480.0409 | 0.052% | -2 | -3.18 | 0,2X3-H            |
| 480.5452 | 0.041% | -2 | -2.32 | 0,2X3              |
| 481.0268 | 0.490% | -3 | -2.65 | 1,5X5              |
| 482.3813 | 0.032% | -3 | -3.18 | M"-H2O-CO2-SO3     |
| 483.0535 | 0.028% | -3 | -2.69 | M-H2O-CO2-SO3      |
| 485.6984 | 0.021% | -3 | -3.30 | 0,2X5              |
| 488.3849 | 0.068% | -3 | -3.00 | M"-CO2-SO3         |
| 490.3583 | 0.014% | -3 | -3.00 | 2,5X5-2H           |
| 494.9979 | 0.072% | -1 | -3.14 | B2'                |
| 494.9979 | 0.072% | -2 | -3.14 | B4"                |
| 495.0300 | 0.019% | -3 | -3.37 | 0,3X5-2H           |
| 495.5019 | 0.041% | -2 | -2.94 | B4'                |
| 495.6697 | 0.018% | -3 | -3.18 | M'-RE-H2O          |
| 495.7023 | 0.016% | -3 | -2.47 | 0,3X5              |
| 496.0055 | 0.193% | -1 | -3.55 | B2                 |
| 496.0055 | 0.193% | -2 | -3.55 | B4                 |
| 496.0055 | 0.193% | -3 | -3.55 | M-RE-H2O           |
| 497.0445 | 0.114% | -3 | -3.29 | M"-H2O-SO3         |
| 498.5718 | 0.167% | -2 | -3.26 | Z4-S               |
| 500.0353 | 0.041% | -2 | -3.07 | 3,5A5-S            |
| 500.3617 | 0.051% | -3 | -3.13 | 3,5X5-2H;1,4X5     |
| 501.1380 | 0.055% | -1 | -3.19 | Z2-S               |
| 503.0483 | 0.715% | -3 | -2.80 | M-2H-SO3           |
| 504.0033 | 0.186% | -2 | -2.72 | C4"                |
| 505.0106 | 0.127% | -2 | -3.84 | C4                 |
| 506.5693 | 0.073% | -2 | -3.09 | Y4"-S              |
| 507.5771 | 0.147% | -2 | -3.16 | Y4-S               |
| 509.0336 | 0.042% | -3 | -3.04 | M"-H2O-CO2         |
| 509.0730 | 0.016% | -1 | -4.37 | 1,4X1;3,5X1-2H     |

|          |        |    |       |                      |
|----------|--------|----|-------|----------------------|
| 512.0006 | 0.083% | -1 | -3.15 | C2"                  |
| 514.0164 | 0.229% | -1 | -2.83 | C2                   |
| 515.0369 | 0.145% | -3 | -3.36 | M"-CO2               |
| 519.1484 | 0.106% | -1 | -3.32 | Y2-S<br>M"-H2O-3CO2- |
| 520.4158 | 0.013% | -3 | 0.10  | SO3+A                |
| 521.5744 | 0.069% | -2 | -3.29 | 1,5X4-S              |
| 523.6967 | 0.075% | -3 | -3.21 | M"-H2O               |
| 529.7002 | 1.851% | -3 | -3.37 | M"                   |
| 535.0792 | 0.224% | -2 | -4.53 | 2,5X4-2S-2H          |
| 535.0792 | 0.224% | -3 | 0.33  | M"-H2O-2CO2-SO3+A    |
| 535.4138 | 0.111% | -3 | -2.20 | M'-H2O-2CO2-SO3+A    |
| 537.5422 | 0.034% | -2 | -3.28 | Z4"                  |
| 538.0459 | 0.021% | -2 | -3.67 | Z4'                  |
| 538.5498 | 0.870% | -2 | -3.71 | Z4                   |
| 540.0135 | 0.090% | -2 | -3.31 | 3,5A5                |
| 543.0351 | 0.037% | -2 | -3.52 | B5"-S                |
| 543.5389 | 0.017% | -2 | -3.73 | B5'-S                |
| 546.5476 | 1.223% | -2 | -2.99 | Y4"                  |
| 547.1432 | 0.034% | -1 | -3.40 | 1,5X2-S              |
| 548.0556 | 0.111% | -1 | -1.28 | 0,2A3-S-2H           |
| 552.0405 | 0.126% | -2 | -3.43 | C5"-S                |
| 553.0482 | 0.095% | -2 | -3.65 | C5-S                 |
| 561.5529 | 0.243% | -2 | -3.00 | 1,5X4                |
| 567.0605 | 0.015% | -2 | -3.55 | 0,2X4-S-2H           |
| 567.5645 | 0.016% | -2 | -3.45 | 0,2X4-S-H            |
| 570.0239 | 0.050% | -2 | -3.46 | 1,5A5                |
| 570.4072 | 0.144% | -3 | -3.29 | M"-SO3+A             |
| 581.0944 | 0.089% | -1 | -3.43 | Z2                   |
| 583.0135 | 0.031% | -1 | -3.46 | 3,5A3-H              |
| 583.0135 | 0.031% | -2 | -3.46 | B5"                  |
| 583.5174 | 0.033% | -2 | -3.47 | B5'                  |
| 584.0214 | 0.140% | -1 | -3.27 | 3,5A3                |
| 584.0214 | 0.140% | -2 | -3.27 | B5                   |
| 590.0648 | 0.021% | -2 | -0.82 | 3,5X4-S-2H           |
| 590.0648 | 0.021% | -1 | -3.50 | B3"-S                |
| 591.0729 | 0.034% | -2 | -0.38 | 3,5X4-S              |
| 591.0729 | 0.034% | -1 | -3.04 | B3'-S                |
| 592.0187 | 0.287% | -2 | -3.47 | C5"                  |
| 592.0809 | 0.050% | -1 | -2.76 | B3-S                 |
| 593.0265 | 0.296% | -2 | -3.43 | C5                   |

|          |        |    |       |              |
|----------|--------|----|-------|--------------|
| 597.0592 | 0.022% | -3 | -3.57 | M"+A         |
| 597.0894 | 0.031% | -1 | -3.14 | Y2"          |
| 597.3945 | 0.027% | -3 | -4.64 | M'+A         |
| 599.1049 | 0.166% | -1 | -3.47 | Y2           |
| 608.0753 | 0.083% | -1 | -3.58 | C3"-S        |
| 619.0844 | 0.015% | -2 | -3.02 | Z5-2S        |
| 620.0317 | 0.019% | -2 | -3.40 | 3,5A6-S-2H   |
| 627.0997 | 0.077% | -1 | -3.53 | 1,5X2        |
| 639.1236 | 0.014% | -1 | -3.25 | 0,2X2-S-H    |
| 642.0869 | 0.017% | -2 | -3.17 | 1,5X5-2S     |
| 670.0217 | 0.016% | -1 | -3.02 | B3"          |
| 671.0293 | 0.045% | -1 | -3.31 | B3'          |
| 672.0372 | 0.067% | -1 | -3.24 | B3           |
| 682.0649 | 0.023% | -2 | -3.57 | 1,5X5-S      |
| 688.0317 | 0.105% | -1 | -3.70 | C3"          |
| 688.5685 | 0.013% | -2 | -4.04 | 0,2X5-S-H    |
| 690.0475 | 0.031% | -1 | -3.50 | C3           |
| 704.5333 | 0.024% | -2 | -4.05 | M-RE-H2O-SO3 |
| 724.1519 | 0.029% | -1 | 4.56  | 1,5A4-3S-H   |
| 740.1468 | 0.023% | -1 | -3.68 | Z3"-2S       |
| 742.1627 | 0.014% | -1 | -3.35 | Z3-2S        |
| 755.0753 | 0.024% | -2 | -3.77 | M"-SO3       |
| 795.0531 | 0.021% | -2 | -4.39 | M"           |
| 820.1027 | 0.014% | -1 | -4.47 | Z3"-S        |
| 822.1189 | 0.015% | -1 | -3.83 | Z3-S         |
| 831.0892 | 0.015% | -1 | -3.93 | B4"-2S       |
| 838.1136 | 0.017% | -1 | -3.97 | Y3"-S        |

Table S8. List of assigned peaks in the NETD spectrum of H2 [M - 5H]<sup>5-</sup>

| m/z      | Intensity | Charge | Error (ppm) | Assignment |
|----------|-----------|--------|-------------|------------|
| 167.6859 | 0.006%    | -3     | -4.05       | 1,4A3-H    |
| 191.0197 | 0.009%    | -1     | -0.15       | C1"        |
| 193.0354 | 0.012%    | -1     | -0.11       | C1         |
| 207.5215 | 0.006%    | -2     | -0.25       | B2-S       |
| 207.5215 | 0.006%    | -4     | -0.25       | B4-2S      |
| 211.0338 | 0.054%    | -2     | -0.22       | Y1         |
| 246.4921 | 0.030%    | -2     | -0.26       | B2"        |
| 247.4999 | 0.046%    | -2     | -0.36       | B2         |
| 247.4999 | 0.046%    | -4     | -0.36       | B4         |
| 255.4974 | 0.091%    | -2     | -0.25       | C2"        |
| 256.0132 | 0.031%    | -1     | -0.29       | C1"-S      |
| 256.5052 | 1.506%    | -2     | -0.34       | C2         |
| 273.2749 | 0.009%    | -4     | -0.20       | Y4         |
| 277.0066 | 0.010%    | -2     | 0.03        | 2,4A3-H    |
| 277.0066 | 0.010%    | -4     | 0.03        | 2,5A5      |
| 279.3726 | 0.023%    | -3     | -0.39       | Y3-S       |
| 290.0079 | 0.013%    | -3     | -0.25       | 0,2A4      |
| 291.5079 | 0.044%    | -2     | -0.34       | 3,5A3      |
| 291.5079 | 0.044%    | -4     | -0.34       | B5         |
| 298.0419 | 0.034%    | -2     | -0.26       | Y2"        |
| 299.0498 | 0.551%    | -2     | -0.23       | Y2         |
| 303.6834 | 0.323%    | -3     | -0.36       | B4-S       |
| 305.5053 | 0.007%    | -2     | -0.52       | 2,5A3-2H   |
| 306.0248 | 0.054%    | -3     | -0.34       | Y3         |
| 309.0151 | 0.006%    | -3     | 0.03        | C4"-S      |
| 314.5107 | 0.017%    | -2     | -0.21       | 0,2A3      |
| 317.0150 | 0.012%    | -4     | -2.98       | 2,5A6-S-2H |
| 319.0595 | 0.008%    | -2     | 0.83        | 0,2X2-S-H  |
| 319.6925 | 0.006%    | -3     | -0.11       | 0,2X3-H    |
| 323.0181 | 0.007%    | -3     | -1.74       | 2,4A5-S-2H |
| 323.0918 | 0.019%    | -1     | -0.29       | Z1"-S      |
| 325.1075 | 0.010%    | -1     | -0.09       | Z1-S       |
| 329.0183 | 0.013%    | -1     | -0.36       | 3,5A2      |
| 329.6638 | 0.013%    | -3     | -0.08       | B4"        |
| 329.9998 | 0.417%    | -3     | -0.12       | B4'        |
| 330.3361 | 0.404%    | -3     | 0.99        | B4         |
| 333.0221 | 0.006%    | -3     | -0.01       | 3,5A5-S    |
| 334.5081 | 0.090%    | -2     | -0.18       | B3"        |
| 335.0119 | 0.027%    | -2     | -0.76       | B3'        |

|          |        |    |       |            |
|----------|--------|----|-------|------------|
| 335.5159 | 0.133% | -2 | -0.24 | B3         |
| 335.6673 | 0.158% | -3 | -0.25 | C4"        |
| 336.0019 | 0.038% | -3 | -4.36 | C4'        |
| 336.3379 | 0.037% | -3 | -3.93 | C4         |
| 337.0042 | 0.006% | -4 | -2.76 | 2,5A6-2H   |
| 337.0401 | 0.051% | -2 | 1.21  | C3-2S      |
| 338.0500 | 0.048% | -3 | -0.17 | Y4-S       |
| 343.1180 | 0.012% | -1 | -0.29 | Y1-S       |
| 343.5134 | 0.063% | -2 | -0.24 | C3"        |
| 344.5214 | 0.074% | -2 | 0.27  | C3         |
| 353.5205 | 0.009% | -4 | -0.21 | Y5         |
| 357.0134 | 0.007% | -1 | 0.18  | 2,5A2-2H   |
| 359.0374 | 0.074% | -2 | -0.47 | 0,2X2-H    |
| 359.6744 | 0.068% | -3 | -0.12 | 3,5A5      |
| 360.0088 | 0.021% | -3 | -4.21 | 1,4A5-H    |
| 360.5192 | 0.070% | -4 | -0.16 | 1,5X5      |
| 362.3608 | 0.050% | -3 | -0.18 | B5-S       |
| 364.0303 | 0.008% | -3 | -0.35 | Y4"        |
| 364.7022 | 0.067% | -3 | -0.18 | Y4         |
| 367.6924 | 0.008% | -3 | -0.31 | C5"-S      |
| 368.3642 | 0.014% | -3 | -0.34 | C5-S       |
| 369.0061 | 0.007% | -3 | 0.10  | 2,5A5-2H   |
| 371.5016 | 0.055% | -4 | -0.19 | M'-RE-H2O  |
| 371.7524 | 0.025% | -4 | -3.21 | M-RE-H2O   |
| 373.0366 | 0.252% | -4 | -0.21 | M-H2O-SO3  |
| 374.0334 | 0.009% | -3 | -1.55 | 1,5X4      |
| 375.0100 | 0.021% | -3 | 1.05  | 0,2A5      |
| 375.0237 | 0.074% | -1 | -0.38 | 0,2A2      |
| 377.0354 | 0.007% | -4 | 0.03  | M"-SO3     |
| 377.2873 | 0.007% | -4 | -0.25 | M'-SO3     |
| 377.5392 | 0.096% | -4 | -0.43 | M-SO3      |
| 379.3455 | 0.020% | -3 | -0.17 | 1,5A5-H    |
| 379.6813 | 0.009% | -3 | -0.48 | 1,5A5      |
| 381.5244 | 0.005% | -4 | -0.31 | M"-H2O-CO2 |
| 381.7764 | 0.011% | -4 | -0.21 | M'-H2O-CO2 |
| 386.0273 | 0.013% | -4 | 0.31  | M"-CO2     |
| 386.0398 | 0.015% | -1 | -0.13 | 1,5A2-S-2H |
| 386.2788 | 0.013% | -4 | -0.82 | M'-CO2     |
| 388.0555 | 0.030% | -1 | -0.05 | 1,5A2-S    |
| 388.3411 | 0.008% | -3 | -0.22 | B5"        |
| 388.6771 | 0.055% | -3 | -0.17 | B5'        |
| 389.0128 | 0.031% | -3 | -0.65 | B5         |
| 392.5219 | 0.008% | -4 | -0.33 | M"-H2O     |

|          |        |    |       |                  |
|----------|--------|----|-------|------------------|
| 392.7738 | 0.060% | -4 | -0.32 | M'-H2O           |
| 393.0248 | 0.027% | -4 | -2.92 | M-H2O            |
| 394.3448 | 0.139% | -3 | 0.23  | C5''             |
| 394.6792 | 0.045% | -3 | -3.86 | C5'              |
| 395.0168 | 0.141% | -3 | 0.34  | C5               |
| 395.5371 | 0.027% | -4 | -0.33 | M'-RE-CO2-SO3+A  |
| 397.0245 | 0.036% | -4 | -0.35 | M''              |
| 397.2766 | 0.126% | -4 | 0.04  | M'               |
| 397.5285 | 0.456% | -4 | -0.14 | M                |
| 400.0272 | 0.008% | -4 | 2.32  | M'-RE-H2O-2CO2+A |
| 403.0486 | 0.020% | -1 | -0.21 | Z1''             |
| 404.0564 | 0.068% | -1 | -0.15 | Z1'              |
| 405.0642 | 1.248% | -1 | -0.17 | Z1               |
| 409.5494 | 0.007% | -2 | -0.25 | Z3''-S           |
| 410.5573 | 0.023% | -2 | -0.10 | Z3-S             |
| 412.5129 | 0.011% | -2 | 0.11  | 3,5A4            |
| 414.0347 | 0.019% | -1 | -0.26 | B2''-S           |
| 415.0426 | 0.056% | -1 | -0.09 | B2'-S            |
| 415.0426 | 0.056% | -2 | -0.09 | B4''-2S          |
| 416.0504 | 0.642% | -1 | -0.07 | B2-S             |
| 416.0504 | 0.642% | -2 | -0.07 | B4-2S            |
| 418.5549 | 0.006% | -2 | 0.05  | Y3''-S           |
| 419.5626 | 0.015% | -2 | -0.09 | Y3-S             |
| 421.0590 | 0.006% | -1 | -0.45 | Y1''             |
| 423.0748 | 0.058% | -1 | -0.11 | Y1               |
| 424.0478 | 0.013% | -2 | -0.29 | C4''-2S          |
| 426.5103 | 0.008% | -2 | -0.01 | 2,5A4-2H         |
| 427.5181 | 0.017% | -2 | -0.11 | 2,5A4            |
| 427.8069 | 0.113% | -4 | -0.12 | M'-SO3+A         |
| 428.0578 | 0.074% | -4 | -2.56 | M-SO3+A          |
| 432.0453 | 0.339% | -1 | -0.16 | C2''-S           |
| 432.0453 | 0.339% | -4 | 2.74  | M''-H2O-CO2+A    |
| 433.5601 | 0.008% | -2 | -0.02 | 1,5X3-S          |
| 434.0609 | 0.040% | -1 | -0.24 | C2-S             |
| 435.5155 | 0.167% | -2 | -0.13 | 0,2A4            |
| 440.3443 | 0.007% | -3 | 0.05  | 3,5A6            |
| 447.7960 | 0.034% | -4 | -0.27 | M'+A             |
| 448.0467 | 0.024% | -4 | -3.16 | M+A              |
| 450.0315 | 0.006% | -2 | -0.77 | Z3'              |
| 450.5356 | 0.107% | -2 | -0.42 | Z3               |
| 451.0697 | 0.058% | -1 | -0.20 | 1,5X1            |
| 454.3757 | 0.024% | -3 | -0.18 | 1,5X5-S          |
| 455.0208 | 0.082% | -2 | -0.44 | B4''-S           |



|          |        |    |       |                |
|----------|--------|----|-------|----------------|
| 455.5243 | 0.052% | -2 | -1.29 | B4'-S          |
| 455.6795 | 0.088% | -3 | 0.13  | 0,2A6          |
| 456.0284 | 0.065% | -2 | -1.06 | B4-S           |
| 458.5332 | 0.035% | -2 | -0.13 | Y3"            |
| 459.0372 | 0.022% | -2 | 0.16  | Y3'            |
| 459.5410 | 0.087% | -2 | -0.16 | Y3             |
| 459.6894 | 0.011% | -3 | 4.41  | 1,5A6-S-H      |
| 464.0263 | 0.241% | -2 | -0.10 | C4"-S          |
| 464.0775 | 0.019% | -1 | -0.19 | 0,2X1-H        |
| 464.5279 | 0.060% | -2 | -4.91 | C4'-S          |
| 465.6929 | 0.020% | -3 | -0.15 | Z5             |
| 468.6831 | 0.024% | -3 | 0.02  | M"-RE-H2O-SO3  |
| 469.0177 | 0.011% | -3 | -2.86 | M'-RE-H2O-SO3  |
| 469.3550 | 0.189% | -3 | 0.04  | M-RE-H2O-SO3   |
| 471.6965 | 0.017% | -3 | 0.17  | Y5             |
| 472.0119 | 0.009% | -3 | -0.87 | M"-RE-2CO2     |
| 473.5385 | 0.043% | -2 | -0.12 | 1,5X3          |
| 476.0723 | 0.015% | -1 | 1.51  | 2,4A3-S        |
| 477.0619 | 0.006% | -2 | -4.90 | 2,4X3-S-H      |
| 480.0423 | 0.041% | -2 | -0.24 | 0,2X3-H        |
| 480.0423 | 0.041% | -3 | -4.60 | M'-H2O-3CO2    |
| 480.5450 | 0.013% | -2 | -2.79 | 0,2X3          |
| 481.0281 | 0.155% | -3 | -0.04 | 1,5X5          |
| 482.3827 | 0.007% | -3 | -0.36 | M"-H2O-CO2-SO3 |
| 488.3864 | 0.017% | -3 | 0.01  | M"-CO2-SO3     |
| 488.7210 | 0.008% | -3 | -2.71 | M'-H2O-SO3     |
| 493.9917 | 0.012% | -1 | 0.16  | B2"            |
| 494.5436 | 0.008% | -2 | -0.31 | 0,3X3-2H       |
| 494.9995 | 0.036% | -1 | 0.09  | B2'            |
| 494.9995 | 0.036% | -2 | 0.09  | B4"            |
| 495.0314 | 0.008% | -3 | -0.35 | 0,3X5-2H       |
| 495.3354 | 0.007% | -3 | 0.01  | M"-RE-H2O      |
| 495.5033 | 0.108% | -2 | -0.03 | B4'            |
| 495.6705 | 0.006% | -3 | -1.56 | M'-RE-H2O      |
| 496.0071 | 0.071% | -1 | -0.28 | B2             |
| 496.0071 | 0.071% | -2 | -0.28 | B4             |
| 496.0071 | 0.071% | -3 | -0.28 | M-RE-H2O       |
| 497.0461 | 0.053% | -3 | -0.13 | M"-H2O-SO3     |
| 498.5734 | 0.025% | -2 | 0.01  | Z4-S           |
| 500.0368 | 0.008% | -2 | -0.12 | 3,5A5-S        |
| 500.3632 | 0.008% | -3 | -0.09 | 1,4X5          |
| 501.1396 | 0.007% | -1 | 0.10  | Z2-S           |
| 502.5413 | 0.006% | -2 | 0.11  | 1,4X3;3,5X3-2H |

|          |        |    |       |             |
|----------|--------|----|-------|-------------|
| 503.0495 | 0.237% | -3 | -0.41 | M''-SO3     |
| 503.3841 | 0.115% | -3 | -2.90 | M'-SO3      |
| 504.0047 | 0.554% | -2 | -0.02 | C4''        |
| 504.5065 | 0.151% | -2 | -4.30 | C4'         |
| 506.5708 | 0.028% | -2 | -0.07 | Y4''-S      |
| 507.0723 | 0.008% | -2 | -4.81 | Y4'-S       |
| 507.5794 | 0.007% | -2 | 1.36  | Y4-S        |
| 509.0348 | 0.008% | -3 | -0.74 | M''-H2O-CO2 |
| 512.0021 | 0.022% | -1 | -0.09 | C2''        |
| 514.0179 | 0.083% | -1 | 0.11  | C2          |
| 515.0381 | 0.016% | -3 | -1.18 | M''-CO2     |
| 515.3732 | 0.008% | -3 | -2.74 | M'-CO2      |
| 517.1346 | 0.015% | -1 | 0.12  | Y2''-S      |
| 517.5468 | 0.010% | -2 | 0.50  | 2,4X3       |
| 519.1500 | 0.035% | -1 | -0.20 | Y2-S        |
| 521.5759 | 0.011% | -2 | -0.45 | 1,5X4-S     |
| 523.6985 | 0.018% | -3 | 0.19  | M''-H2O     |
| 524.0335 | 0.008% | -3 | -1.59 | M'-H2O      |
| 529.7019 | 0.091% | -3 | 0.02  | M''         |
| 530.0365 | 0.049% | -3 | -2.57 | M'          |
| 537.5442 | 0.008% | -2 | 0.33  | Z4''        |
| 538.0476 | 0.009% | -2 | -0.49 | Z4'         |
| 538.5519 | 0.082% | -2 | 0.17  | Z4          |
| 540.0152 | 0.012% | -2 | -0.22 | 3,5A5       |
| 543.0371 | 0.011% | -2 | 0.01  | B5''-S      |
| 543.5403 | 0.007% | -2 | -1.27 | B5'-S       |
| 544.0450 | 0.018% | -2 | 0.28  | B5-S        |
| 546.5492 | 0.838% | -2 | -0.11 | Y4''        |
| 547.0510 | 0.287% | -2 | -4.05 | Y4'         |
| 547.1452 | 0.009% | -1 | 0.29  | 1,5X2-S     |
| 552.0423 | 0.021% | -2 | -0.10 | C5''-S      |
| 552.5435 | 0.008% | -2 | -4.94 | C5'-S       |
| 553.0504 | 0.022% | -2 | 0.35  | C5-S        |
| 561.5546 | 0.055% | -2 | 0.01  | 1,5X4       |
| 570.4090 | 0.054% | -3 | -0.10 | M''-SO3+A   |
| 570.7437 | 0.043% | -3 | -2.30 | M'-SO3+A    |
| 580.0888 | 0.010% | -1 | 0.35  | Z2'         |
| 581.0965 | 0.063% | -1 | 0.14  | Z2          |
| 583.5192 | 0.008% | -2 | -0.28 | B5'         |
| 584.0233 | 0.039% | -1 | -0.03 | 3,5A3       |
| 584.0233 | 0.039% | -2 | -0.03 | B5          |
| 591.0746 | 0.005% | -2 | 2.47  | 3,5X4-S     |
| 591.0746 | 0.005% | -1 | -0.20 | B3'-S       |

|          |        |    |       |               |
|----------|--------|----|-------|---------------|
| 592.0205 | 0.013% | -2 | -0.34 | C5"           |
| 592.0826 | 0.015% | -1 | 0.21  | B3-S          |
| 593.0288 | 0.034% | -2 | 0.31  | C5            |
| 597.0610 | 0.010% | -3 | -0.52 | M"+A          |
| 597.0913 | 0.027% | -1 | -0.04 | Y2"           |
| 597.3963 | 0.012% | -3 | -1.75 | M'+A          |
| 599.1070 | 0.209% | -1 | 0.09  | Y2            |
| 608.0775 | 0.011% | -1 | 0.11  | C3"-S         |
| 610.0932 | 0.014% | -1 | 0.16  | C3-S          |
| 627.1019 | 0.048% | -1 | 0.10  | 1,5X2         |
| 638.1178 | 0.006% | -1 | -0.10 | 0,2X2-S-2H    |
| 671.0316 | 0.014% | -1 | 0.11  | B3'           |
| 672.0394 | 0.017% | -1 | 0.08  | B3            |
| 688.0344 | 0.014% | -1 | 0.15  | C3"           |
| 690.0504 | 0.018% | -1 | 0.74  | C3            |
| 704.0327 | 0.008% | -2 | 0.66  | M'-RE-H2O-SO3 |
| 704.5359 | 0.018% | -2 | -0.23 | M-RE-H2O-SO3  |
| 719.0832 | 0.006% | -1 | 1.03  | 0,2X2-H       |

Table S9. List of assigned peaks in the NETD spectrum of H3 [M - 5H]<sup>5-</sup>

| m/z      | Intensity | Charge | Error<br>(ppm) | Assignment |
|----------|-----------|--------|----------------|------------|
| 132.5113 | 0.021%    | -4     | -3.77          | 2,5A3-S-H  |
| 167.6862 | 0.014%    | -3     | -2.25          | 1,4A3-S-H  |
| 193.0356 | 0.013%    | -1     | 0.94           | C1         |
| 246.4925 | 0.020%    | -2     | 1.17           | B2"        |
| 247.5002 | 0.069%    | -2     | 0.72           | B2         |
| 247.5002 | 0.069%    | -4     | 0.72           | B4-S       |
| 255.4977 | 0.073%    | -2     | 0.97           | C2"        |
| 256.5055 | 0.377%    | -2     | 0.91           | C2         |
| 291.5083 | 0.021%    | -2     | 0.83           | 3,5A3      |
| 291.5083 | 0.021%    | -4     | 0.83           | B5-S       |
| 293.2644 | 0.015%    | -4     | 0.92           | Y4         |
| 299.0503 | 0.087%    | -2     | 1.45           | Y2         |
| 306.0252 | 0.102%    | -3     | 0.96           | Y3-S       |
| 314.5112 | 0.010%    | -2     | 1.59           | 0,2A3      |
| 323.0923 | 0.052%    | -1     | 1.39           | Z1"-S      |
| 325.1079 | 0.013%    | -1     | 1.26           | Z1-S       |
| 329.0188 | 0.035%    | -1     | 1.27           | 3,5A2      |
| 330.0002 | 0.027%    | -3     | 1.23           | B4'-S      |
| 330.3363 | 0.039%    | -3     | 1.66           | B4-S       |
| 332.0058 | 0.022%    | -3     | 1.26           | Y3"        |
| 332.6779 | 0.748%    | -3     | 1.99           | Y3         |
| 334.5087 | 0.099%    | -4     | 3.79           | 3,5X4-2H   |
| 334.5087 | 0.099%    | -2     | 1.44           | B3"        |
| 335.0599 | 0.111%    | -2     | -1.43          | 1,4X2-S    |
| 335.5165 | 1.166%    | -2     | 1.54           | B3         |
| 335.6681 | 0.026%    | -3     | 2.03           | C4"-S      |
| 336.0941 | 0.061%    | -1     | 1.50           | B2-2S      |
| 336.3399 | 0.046%    | -3     | 1.94           | C4-S       |
| 337.0036 | 0.034%    | -4     | -4.69          | 2,5A6-S-2H |
| 338.0506 | 0.017%    | -3     | 1.51           | Y4-2S      |
| 342.0094 | 0.163%    | -3     | 1.57           | 1,5X3      |
| 343.1185 | 0.027%    | -1     | 1.41           | Y1-S       |
| 343.5140 | 0.023%    | -2     | 1.51           | C3"        |
| 344.5218 | 0.022%    | -2     | 1.51           | C3         |
| 346.3453 | 0.023%    | -3     | 1.40           | 0,2X3-H    |
| 356.6525 | 0.022%    | -3     | 1.22           | B4'        |
| 356.9888 | 0.030%    | -3     | 2.09           | B4         |

|          |        |    |       |               |
|----------|--------|----|-------|---------------|
| 358.6995 | 0.018% | -3 | 1.92  | Z4-S          |
| 359.0296 | 0.041% | -1 | 1.84  | 2,5A2         |
| 359.6751 | 0.027% | -3 | 1.93  | 3,5A5-S       |
| 360.5199 | 0.018% | -4 | 1.82  | 1,5X5-S       |
| 362.3203 | 0.097% | -3 | 1.88  | C4"           |
| 362.6549 | 0.027% | -3 | -1.97 | C4'           |
| 362.9916 | 0.055% | -3 | 0.20  | C4            |
| 364.0311 | 0.014% | -4 | -3.11 | M"-3CO2-SO3   |
| 364.0311 | 0.014% | -3 | 1.92  | Y4"-S         |
| 364.7030 | 0.134% | -3 | 1.77  | Y4-S          |
| 368.7557 | 0.013% | -4 | 1.45  | Z5'           |
| 371.0230 | 0.024% | -4 | 3.00  | 0,3X5-S-2H    |
| 371.5022 | 0.024% | -4 | 1.58  | M'-RE-H2O-SO3 |
| 373.2583 | 0.015% | -4 | 1.35  | Y5'           |
| 373.5105 | 0.076% | -4 | 2.10  | Y5            |
| 373.5373 | 0.046% | -2 | -4.60 | 0,3X2-S-2H    |
| 374.0344 | 0.020% | -3 | 1.10  | 1,5X4-S       |
| 375.0246 | 0.331% | -1 | 1.92  | 0,2A2         |
| 380.5090 | 0.558% | -4 | 1.51  | 1,5X5         |
| 384.0131 | 0.019% | -4 | 1.79  | 0,2X5         |
| 384.6798 | 0.083% | -3 | 1.61  | Z4"           |
| 385.0159 | 0.072% | -3 | 2.04  | Z4'           |
| 385.3519 | 1.277% | -3 | 2.12  | Z4            |
| 386.0403 | 0.018% | -1 | 1.22  | 1,5A2-S-2H    |
| 386.3273 | 0.165% | -3 | 1.51  | 3,5A5         |
| 386.6618 | 0.054% | -3 | -2.17 | 1,4X4-S-H     |
| 387.5080 | 0.026% | -4 | 2.23  | 2,5X5-2H      |
| 387.7588 | 0.014% | -4 | -0.92 | 2,5X5-H       |
| 388.6778 | 0.015% | -3 | 1.68  | B5'-S         |
| 389.0139 | 0.038% | -3 | 1.99  | B5-S          |
| 390.6833 | 1.086% | -3 | 1.46  | Y4"           |
| 391.0178 | 0.365% | -3 | -2.25 | Y4'           |
| 391.2626 | 0.028% | -4 | -1.20 | 0,3X5-H       |
| 391.3548 | 0.399% | -3 | 0.48  | Y4            |
| 391.4917 | 0.128% | -4 | 2.22  | M'-RE-H2O     |
| 391.7426 | 0.065% | -4 | -0.47 | M-RE-H2O      |
| 392.5226 | 0.036% | -4 | 1.66  | M"-H2O-SO3    |
| 392.7744 | 0.049% | -4 | 1.03  | M'-H2O-SO3    |
| 393.0265 | 0.540% | -4 | 1.42  | M-H2O-SO3     |
| 394.3455 | 0.076% | -3 | 1.86  | C5"-S         |
| 394.6799 | 0.025% | -3 | -1.99 | C5'-S         |

|          |        |    |       |                      |
|----------|--------|----|-------|----------------------|
| 395.0112 | 0.207% | -4 | 3.45  | 1,4X5;3,5X5-2H       |
| 395.2616 | 0.093% | -4 | -0.44 | 3,5X5-H              |
| 395.7423 | 0.031% | -4 | 1.87  | M"-RE                |
| 395.9929 | 0.015% | -3 | -3.35 | 2,5A5-H              |
| 395.9929 | 0.015% | -1 | 4.40  | 2,5X1                |
| 395.9929 | 0.015% | -4 | -1.41 | M'-RE                |
| 397.0253 | 0.134% | -4 | 1.64  | M"-SO3               |
| 397.2767 | 0.107% | -4 | 0.18  | M'-SO3               |
| 397.5292 | 0.808% | -4 | 1.65  | M-SO3                |
| 400.0156 | 0.017% | -3 | 3.24  | 1,5X4-2H             |
| 400.0280 | 0.043% | -4 | 4.27  | M'-RE-H2O-2CO2-SO3+A |
| 400.6868 | 0.716% | -3 | 1.48  | 1,5X4                |
| 401.5145 | 0.034% | -4 | 1.94  | M"-H2O-CO2           |
| 401.6625 | 0.019% | -3 | 1.64  | 0,2A5                |
| 401.7661 | 0.042% | -4 | 1.10  | M'-H2O-CO2           |
| 402.0169 | 0.027% | -4 | -1.95 | M-H2O-CO2            |
| 402.2610 | 0.025% | -4 | 1.17  | 2,4X5-H              |
| 402.5118 | 0.014% | -4 | -1.71 | 2,4X5                |
| 403.0493 | 0.040% | -1 | 1.64  | Z1"                  |
| 404.0573 | 0.054% | -1 | 2.02  | Z1'                  |
| 404.6949 | 0.031% | -3 | 1.93  | 0,2X4-S-H            |
| 405.0651 | 1.967% | -1 | 1.95  | Z1                   |
| 406.0170 | 0.050% | -4 | 1.61  | M"-CO2               |
| 406.2691 | 0.111% | -4 | 1.86  | M'-CO2               |
| 406.3344 | 0.025% | -3 | 1.65  | 1,5A5                |
| 406.5201 | 0.053% | -4 | -0.53 | M-CO2                |
| 407.9918 | 0.038% | -1 | 1.48  | 0,3X1-2H             |
| 407.9918 | 0.038% | -2 | 1.48  | B3-S                 |
| 409.5504 | 0.012% | -2 | 2.12  | Z3"-2S               |
| 410.0267 | 0.016% | -3 | 2.26  | 2,5X4-S-H            |
| 410.5581 | 0.024% | -2 | 1.79  | Z3-2S                |
| 412.5112 | 0.047% | -2 | -3.83 | 3,5A4                |
| 412.5112 | 0.047% | -4 | 0.13  | M"-H2O               |
| 412.7637 | 2.684% | -4 | 1.41  | M'-H2O               |
| 413.0145 | 1.513% | -4 | -1.47 | M-H2O                |
| 414.0354 | 0.048% | -1 | 1.47  | B2"-S                |
| 414.5256 | 0.016% | -2 | 0.96  | 0,3X2                |
| 414.9943 | 0.017% | -3 | 1.90  | B5"                  |
| 415.0434 | 0.042% | -1 | 1.89  | B2'-S                |
| 415.0434 | 0.042% | -2 | 1.89  | B4"-3S               |
| 415.3302 | 0.100% | -3 | 1.90  | B5'                  |

|          |        |    |       |                   |
|----------|--------|----|-------|-------------------|
| 415.6659 | 0.070% | -3 | 1.35  | B5                |
| 416.0512 | 0.437% | -1 | 1.95  | B2-S              |
| 417.0148 | 0.291% | -4 | 2.33  | M''               |
| 417.2664 | 0.555% | -4 | 1.38  | M'                |
| 417.5183 | 2.396% | -4 | 1.21  | M                 |
| 419.5635 | 0.020% | -2 | 1.96  | Y3-2S             |
| 420.9977 | 0.440% | -3 | 1.69  | C5''              |
| 421.3323 | 0.161% | -3 | -1.47 | C5'               |
| 421.5526 | 0.024% | -4 | 4.92  | M-H2O-2CO2-SO3+A  |
| 421.6695 | 0.781% | -3 | 1.53  | C5                |
| 423.0758 | 0.093% | -1 | 2.24  | Y1                |
| 431.3474 | 0.786% | -3 | 2.24  | 0,2X4-H           |
| 431.6821 | 0.300% | -3 | -0.60 | 0,2X4             |
| 432.0461 | 1.131% | -1 | 1.72  | C2''-S            |
| 432.0461 | 1.131% | -4 | 4.62  | M''-H2O-CO2-SO3+A |
| 433.5611 | 0.013% | -2 | 2.19  | 1,5X3-2S          |
| 434.0617 | 0.118% | -1 | 1.73  | C2-S              |
| 435.5165 | 0.029% | -2 | 2.20  | 0,2A4-S           |
| 435.5165 | 0.029% | -4 | 2.10  | M'-RE-CO2+A       |
| 436.6790 | 0.075% | -3 | 2.03  | 2,5X4-H           |
| 437.0138 | 0.027% | -3 | -0.45 | 2,5X4             |
| 439.0415 | 0.017% | -3 | 2.01  | Z5-2S             |
| 440.3452 | 0.013% | -3 | 2.15  | 3,5A6-S           |
| 447.5441 | 0.026% | -4 | -0.26 | M''-SO3+A         |
| 447.7970 | 0.474% | -4 | 1.89  | M'-SO3+A          |
| 448.0478 | 0.356% | -4 | -0.76 | M-SO3+A           |
| 449.5288 | 0.035% | -2 | 1.84  | B3''-S            |
| 450.0327 | 0.078% | -2 | 1.78  | Z3'-S             |
| 450.5367 | 0.076% | -2 | 2.02  | Z3-S              |
| 451.0705 | 0.070% | -1 | 1.60  | 1,5X1             |
| 454.3766 | 0.037% | -3 | 1.77  | 1,5X5-2S          |
| 455.6801 | 0.058% | -3 | 1.37  | 0,2A6-S           |
| 456.0303 | 0.022% | -2 | 3.14  | B4-2S             |
| 458.5341 | 0.194% | -2 | 1.96  | Y3''-S            |
| 459.0360 | 0.048% | -2 | -2.54 | Y3'-S             |
| 459.5418 | 0.132% | -2 | 1.52  | Y3-S              |
| 464.0273 | 0.055% | -2 | 2.05  | C4''-2S           |
| 464.5283 | 0.015% | -2 | -4.14 | C4'-2S            |
| 465.0206 | 0.030% | -3 | -0.93 | Z5''-S            |
| 465.3574 | 0.014% | -3 | 0.91  | Z5'-S             |
| 465.6940 | 0.106% | -3 | 2.28  | Z5-S              |

|          |        |    |       |                   |
|----------|--------|----|-------|-------------------|
| 466.9971 | 0.008% | -3 | 1.07  | 3,5A6             |
| 467.7863 | 0.098% | -4 | 1.95  | M'+A              |
| 468.0371 | 0.080% | -4 | -0.42 | M+A               |
| 471.0259 | 0.015% | -3 | 2.77  | Y5"-S             |
| 471.6978 | 0.031% | -3 | 2.89  | Y5-S              |
| 473.5395 | 0.129% | -2 | 2.12  | 1,5X3-S           |
| 475.4950 | 0.005% | -2 | 2.10  | 0,2A4             |
| 477.0005 | 0.023% | -3 | 0.84  | 2,5A6             |
| 477.9976 | 0.017% | -3 | -0.41 | M"-RE-H2O-3CO2    |
| 479.5397 | 0.016% | -2 | 2.44  | 0,2X3-S-2H        |
| 480.0434 | 0.060% | -2 | 2.05  | 0,2X3-S-H         |
| 480.0434 | 0.060% | -3 | -2.31 | M'-H2O-3CO2-SO3   |
| 480.5459 | 0.018% | -2 | -0.95 | 0,2X3-S           |
| 481.0293 | 0.160% | -3 | 2.60  | 1,5X5-S           |
| 482.3329 | 0.140% | -3 | 2.44  | 0,2A6             |
| 483.9997 | 0.094% | -3 | -3.26 | M"-RE-3CO2        |
| 485.3647 | 0.025% | -3 | 1.33  | 0,2X5-S-H         |
| 485.6998 | 0.013% | -3 | -0.44 | 0,2X5-S           |
| 486.6773 | 0.015% | -3 | 3.51  | 1,5A6-S           |
| 492.3465 | 0.197% | -3 | 2.64  | Z5                |
| 495.0005 | 0.107% | -1 | 2.10  | B2'               |
| 495.0005 | 0.107% | -2 | 2.10  | B4"-S             |
| 495.3364 | 0.129% | -3 | 2.14  | M"-RE-H2O-SO3     |
| 495.5034 | 0.037% | -2 | 0.18  | B4'-S             |
| 495.6711 | 0.052% | -3 | -0.49 | M'-RE-H2O-SO3     |
| 496.0082 | 2.129% | -1 | 1.86  | B2                |
| 496.0082 | 2.129% | -2 | 1.86  | B4-S              |
| 496.0082 | 2.129% | -3 | 1.86  | M-RE-H2O-SO3      |
| 497.6782 | 0.041% | -3 | 2.69  | Y5"               |
| 498.0135 | 0.016% | -3 | 1.35  | Y5'               |
| 498.3499 | 0.077% | -3 | 2.26  | Y5                |
| 498.5126 | 0.039% | -2 | 1.85  | Y3"               |
| 498.5745 | 0.021% | -2 | 2.21  | Z4-2S             |
| 499.0159 | 0.050% | -2 | 0.68  | Y3'               |
| 499.5205 | 0.167% | -2 | 2.01  | Y3                |
| 500.3642 | 0.017% | -3 | 1.95  | 1,4X5-S; 3,5X5-2H |
| 504.0059 | 0.094% | -2 | 2.38  | C4"-S             |
| 504.0670 | 0.028% | -1 | 1.00  | 3,5A3-S           |
| 504.5075 | 0.026% | -2 | -2.28 | C4'-S             |
| 505.0147 | 0.018% | -2 | 4.22  | C4-S              |
| 507.6814 | 0.254% | -3 | 1.95  | 1,5X5             |



|          |        |    |       |                     |
|----------|--------|----|-------|---------------------|
| 509.0363 | 0.023% | -3 | 2.33  | M"-H2O-CO2-SO3      |
| 509.3710 | 0.013% | -3 | -0.24 | M'-H2O-CO2-SO3      |
| 512.0035 | 0.194% | -1 | 2.56  | C2"                 |
| 513.5180 | 0.274% | -2 | 2.16  | 1,5X3               |
| 514.0192 | 0.232% | -1 | 2.66  | C2                  |
| 515.0396 | 0.043% | -2 | -4.96 | 2,5A4-2S            |
| 515.0396 | 0.043% | -3 | 1.81  | M"-CO2-SO3          |
| 515.3742 | 0.024% | -3 | -0.70 | M'-CO2-SO3          |
| 517.0129 | 0.012% | -3 | 1.66  | 2,5X5-2H            |
| 519.1513 | 0.023% | -1 | 2.23  | Y2-S                |
| 520.0219 | 0.095% | -2 | 2.11  | 0,2X3-H             |
| 520.5253 | 0.052% | -2 | 0.97  | 0,2X3               |
| 523.6998 | 0.349% | -3 | 2.58  | M"-H2O-SO3          |
| 524.0351 | 0.312% | -3 | 1.39  | M'-H2O-SO3          |
| 527.0166 | 0.031% | -3 | 2.05  | 1,4X5;3,5X5-2H      |
| 527.3514 | 0.015% | -3 | -0.19 | 3,5X5-H             |
| 529.7032 | 0.868% | -3 | 2.36  | M"-SO3              |
| 530.0373 | 0.459% | -3 | -1.08 | M'-SO3              |
| 535.0284 | 0.026% | -2 | 4.32  | 0,3X3-H             |
| 535.0826 | 0.013% | -2 | 1.93  | 2,5X4-3S-2H         |
| 535.5311 | 0.024% | -2 | 1.96  | 0,3X3               |
| 535.6887 | 0.016% | -3 | 2.37  | M"-H2O-CO2          |
| 537.5452 | 0.028% | -2 | 2.22  | Z4"-S               |
| 538.0485 | 0.017% | -2 | 1.15  | Z4'-S               |
| 538.5531 | 0.134% | -2 | 2.35  | Z4-S                |
| 541.6921 | 0.014% | -3 | 2.23  | M"-CO2              |
| 543.0382 | 0.015% | -2 | 2.11  | B5"-2S              |
| 543.9843 | 0.053% | -2 | 2.25  | C4"                 |
| 544.4861 | 0.017% | -2 | -1.65 | C4'                 |
| 546.5504 | 0.140% | -2 | 2.01  | Y4"-S               |
| 547.0523 | 0.050% | -2 | -1.55 | Y4'-S               |
| 547.5593 | 0.019% | -2 | 3.99  | Y4-S                |
| 548.0332 | 0.032% | -3 | 3.11  | M"-RE-H2O-CO2-SO3+A |
| 550.3518 | 0.079% | -3 | 2.05  | M"-H2O              |
| 550.6866 | 0.045% | -3 | -0.10 | M'-H2O              |
| 552.0434 | 0.012% | -2 | 1.90  | C5"-2S              |
| 553.0517 | 0.020% | -2 | 2.78  | C5-2S               |
| 556.0305 | 0.073% | -1 | 3.84  | 2,4A3               |
| 556.3557 | 0.124% | -3 | 2.66  | M"                  |
| 556.6900 | 0.075% | -3 | -0.25 | M'                  |
| 557.0200 | 0.038% | -2 | -1.89 | 2,4X3-H             |

|          |        |    |       |             |
|----------|--------|----|-------|-------------|
| 561.5559 | 0.035% | -2 | 2.34  | 1,5X4-S     |
| 577.5237 | 0.013% | -2 | 2.29  | Z4"         |
| 578.0274 | 0.031% | -2 | 1.85  | Z4'         |
| 578.5316 | 0.128% | -2 | 2.31  | Z4          |
| 581.0978 | 0.025% | -1 | 2.39  | Z2          |
| 583.0166 | 0.019% | -1 | 2.01  | 3,5A3-H     |
| 583.0166 | 0.019% | -2 | 2.01  | B5"-S       |
| 583.5201 | 0.014% | -2 | 1.17  | B5'-S       |
| 584.0246 | 0.119% | -1 | 2.28  | 3,5A3       |
| 584.0246 | 0.119% | -2 | 2.28  | B5-S        |
| 586.5290 | 0.053% | -2 | 2.21  | Y4"         |
| 587.0325 | 0.034% | -2 | 1.46  | Y4'         |
| 587.5371 | 0.021% | -2 | 2.66  | Y4          |
| 590.0682 | 0.017% | -2 | 4.95  | 3,5X4-2S-2H |
| 590.0682 | 0.017% | -1 | 2.28  | B3"-S       |
| 591.0763 | 0.022% | -1 | 2.66  | B3'-S       |
| 592.0222 | 0.041% | -2 | 2.53  | C5"-S       |
| 592.0841 | 0.027% | -1 | 2.71  | B3-S        |
| 593.0302 | 0.114% | -2 | 2.74  | C5-S        |
| 597.0628 | 0.027% | -3 | 2.40  | M"-SO3+A    |
| 597.3977 | 0.026% | -3 | 0.64  | M'-SO3+A    |
| 597.7316 | 0.013% | -3 | -2.66 | M-SO3+A     |
| 599.1084 | 0.050% | -1 | 2.40  | Y2          |
| 601.5343 | 0.036% | -2 | 2.29  | 1,5X4       |
| 607.0424 | 0.016% | -2 | 2.33  | 0,2X4-S-2H  |
| 615.0400 | 0.014% | -2 | 2.63  | 2,5X4-S-2H  |
| 624.0032 | 0.048% | -2 | 2.33  | B5          |
| 627.1034 | 0.014% | -1 | 2.38  | 1,5X2       |
| 633.0086 | 0.063% | -2 | 2.60  | C5          |

Table S10. List of assigned peaks in the NETD spectrum of [1, 1, 2, 1, 3] from HSPIM, [M - 3H]<sup>3-</sup>

| m/z      | Intensity | Charge | Error<br>(ppm) | Assignment |
|----------|-----------|--------|----------------|------------|
| 157.0144 | 0.006%    | -1     | 0.78           | B1         |
| 168.4893 | 3.544%    | -2     | 0.47           | Y1         |
| 175.0249 | 0.020%    | -1     | 0.57           | C1         |
| 219.5217 | 0.004%    | -2     | 0.53           | B2         |
| 228.5270 | 0.007%    | -2     | 0.67           | C2         |
| 239.0106 | 0.017%    | -1     | 0.45           | Z1'-S      |
| 240.0185 | 0.276%    | -1     | 0.55           | Z1-S       |
| 247.5000 | 0.007%    | -2     | 0.10           | Z2         |
| 247.9542 | 0.147%    | -1     | 0.81           | 0,3X0      |
| 256.0134 | 0.017%    | -1     | 0.50           | Y1''-S     |
| 257.0212 | 0.003%    | -1     | 0.59           | Y1'-S      |
| 258.0290 | 0.192%    | -1     | 0.49           | Y1-S       |
| 286.0240 | 0.027%    | -1     | 0.54           | 1,5X1-S    |
| 286.4708 | 0.010%    | -2     | 0.82           | Z2''       |
| 298.0241 | 0.076%    | -1     | 0.90           | 0,2X1-S-2H |
| 298.0241 | 0.076%    | -2     | 0.90           | 0,2X2      |
| 300.0396 | 0.156%    | -1     | 0.30           | 0,2X1-S    |
| 307.5379 | 0.060%    | -2     | 1.03           | B3         |
| 311.0082 | 0.004%    | -1     | 1.29           | 3,5A2      |
| 315.0267 | 0.024%    | -1     | 0.55           | 2,5X1-S-H  |
| 316.5431 | 0.042%    | -2     | 0.56           | C3         |
| 319.9754 | 0.018%    | -1     | 0.77           | Z1         |
| 328.0346 | 0.026%    | -1     | 0.61           | 0,3X1-S-2H |
| 328.0346 | 0.026%    | -2     | 0.61           | 2,4X2-S    |
| 337.9859 | 0.258%    | -1     | 0.60           | Y1         |
| 339.0030 | 0.009%    | -1     | 0.63           | 2,5A2-2H   |
| 349.0400 | 0.012%    | -2     | 0.81           | Z3-S       |
| 350.1093 | 0.004%    | -1     | 0.19           | 1,5A2-S    |
| 357.0136 | 0.041%    | -1     | 0.71           | 0,2A2      |
| 357.0378 | 0.004%    | -2     | 1.83           | Y3''-S     |
| 357.5414 | 0.011%    | -2     | 1.03           | Y3'-S      |
| 358.0452 | 0.079%    | -2     | 0.78           | Y3-S       |
| 365.9809 | 0.609%    | -1     | 0.77           | 1,5X1      |
| 372.0428 | 0.015%    | -2     | 1.00           | 1,5X3-S    |
| 376.0888 | 0.004%    | -1     | 0.65           | C2''-S     |
| 378.0428 | 0.010%    | -2     | 0.99           | 0,2X3-S-2H |
| 378.1046 | 0.013%    | -1     | 1.07           | C2-S       |

|          |        |    |       |                |
|----------|--------|----|-------|----------------|
| 378.5465 | 0.051% | -2 | 0.42  | 0,2X3-S-H      |
| 378.9888 | 0.053% | -1 | 0.89  | 0,2X1-H        |
| 379.0505 | 0.112% | -2 | 0.68  | 0,2X3-S        |
| 384.0610 | 0.005% | -2 | 1.15  | M-H2O-2CO2-SO3 |
| 386.0403 | 0.023% | -2 | 1.01  | 2,5X3-S-2H     |
| 388.0106 | 0.021% | -2 | 0.88  | Z3"            |
| 388.5148 | 0.009% | -2 | 1.52  | Z3'            |
| 389.0186 | 0.156% | -2 | 1.32  | Z3             |
| 393.9763 | 0.004% | -1 | 1.99  | 2,5X1-2H       |
| 397.0161 | 0.291% | -2 | 1.46  | Y3"            |
| 397.5192 | 0.112% | -2 | -0.57 | Y3'            |
| 398.0240 | 0.128% | -2 | 1.51  | Y3             |
| 405.5520 | 0.007% | -2 | 0.95  | M'-H2O-CO2-SO3 |
| 407.5375 | 0.038% | -2 | 0.92  | 0,2A4          |
| 410.0401 | 0.003% | -1 | 0.51  | 1,5A2-2H       |
| 412.0213 | 0.113% | -2 | 1.05  | 1,5X3          |
| 412.0561 | 0.167% | -1 | 1.33  | 1,5A2          |
| 414.0352 | 0.291% | -1 | 1.10  | Z2"-S          |
| 414.5574 | 0.012% | -2 | 1.30  | M'-CO2-SO3     |
| 416.0506 | 0.048% | -1 | 0.44  | Z2-S           |
| 418.0213 | 0.028% | -2 | 1.05  | 0,2X3-2H       |
| 418.5254 | 1.935% | -2 | 1.53  | 0,2X3-H        |
| 426.0188 | 0.010% | -2 | 1.24  | 2,5X3-2H       |
| 427.0434 | 0.007% | -2 | 1.85  | M"-H2O-SO3     |
| 427.5470 | 0.041% | -2 | 1.09  | M'-H2O-SO3     |
| 428.0511 | 0.343% | -2 | 1.62  | M-H2O-SO3      |
| 432.0188 | 0.103% | -2 | 1.19  | 1,4A4          |
| 432.0458 | 0.014% | -1 | 1.08  | Y2"-S          |
| 436.0484 | 0.036% | -2 | 1.14  | M"-SO3         |
| 436.5526 | 0.023% | -2 | 1.84  | M'-SO3         |
| 437.0564 | 0.531% | -2 | 1.67  | M-SO3          |
| 439.0432 | 0.038% | -1 | 1.29  | B2'            |
| 440.0511 | 0.064% | -1 | 1.42  | B2             |
| 445.0266 | 0.003% | -2 | 1.17  | M"-H2O-CO2     |
| 445.5304 | 0.011% | -2 | 0.88  | M'-H2O-CO2     |
| 453.0215 | 0.024% | -2 | -4.51 | 1,5A4-2H       |
| 453.5281 | 0.007% | -2 | 1.39  | 1,5A4-H        |
| 454.0315 | 0.011% | -2 | 0.33  | M"-CO2;1,5A4   |
| 454.5359 | 0.038% | -2 | 1.39  | M'-CO2         |
| 455.0380 | 0.017% | -2 | -2.73 | M-CO2          |
| 456.0459 | 0.223% | -1 | 1.31  | C2"            |

|          |        |    |       |                 |
|----------|--------|----|-------|-----------------|
| 457.0537 | 0.070% | -1 | 1.24  | C2'             |
| 458.0616 | 0.750% | -1 | 1.31  | C2              |
| 467.5257 | 0.056% | -2 | 1.71  | M'-H2O          |
| 468.0296 | 0.013% | -2 | 1.54  | M-H2O           |
| 476.0271 | 0.020% | -2 | 1.58  | M''             |
| 476.5310 | 0.152% | -2 | 1.73  | M-H             |
| 477.0350 | 0.861% | -2 | 1.89  | M               |
| 493.9924 | 0.020% | -1 | 1.61  | Z2''            |
| 495.0005 | 0.008% | -1 | 2.11  | Z2'             |
| 496.0079 | 0.298% | -1 | 1.41  | Z2              |
| 500.0723 | 0.019% | -1 | 1.40  | 2,4A3           |
| 512.0032 | 0.334% | -1 | 1.96  | Y2''            |
| 514.0184 | 0.017% | -1 | 1.21  | Y2              |
| 516.0912 | 0.004% | -1 | 1.71  | 0,2X2-S-H       |
| 528.0675 | 0.491% | -1 | 2.02  | 3,5A3           |
| 536.1267 | 0.051% | -1 | 1.77  | B3-S            |
| 537.5918 | 0.165% | -2 | 1.68  | M-H-SO3+A       |
| 538.0938 | 0.078% | -2 | -1.94 | M-SO3+A         |
| 542.0137 | 0.291% | -1 | 1.76  | 1,5X2           |
| 554.1374 | 0.020% | -1 | 2.03  | C3-S            |
| 572.0580 | 0.003% | -1 | 2.94  | 0,2A3-2H        |
| 574.0731 | 0.229% | -1 | 1.98  | 0,2A3           |
| 577.5706 | 0.022% | -2 | 2.14  | M'+A            |
| 578.0734 | 0.014% | -2 | 0.21  | M+A             |
| 588.0889 | 0.007% | -1 | 2.20  | 1,5A3           |
| 596.0484 | 0.010% | -1 | 2.19  | 0,2X2-H         |
| 614.0685 | 0.007% | -1 | 2.68  | B3''            |
| 615.0760 | 0.085% | -1 | 2.12  | B3'             |
| 616.0840 | 5.220% | -1 | 2.43  | B3              |
| 619.1311 | 0.015% | -1 | 2.01  | Z3-2S           |
| 632.0788 | 0.199% | -1 | 2.20  | C3''            |
| 634.0946 | 0.455% | -1 | 2.34  | C3              |
| 698.0811 | 0.005% | -1 | 3.36  | Z3'-S           |
| 699.0884 | 0.035% | -1 | 2.60  | Z3-S            |
| 715.0839 | 0.005% | -1 | 3.34  | Y3''-S          |
| 718.1162 | 0.015% | -1 | 2.83  | 2,5A4-S-2H      |
| 736.1268 | 0.183% | -1 | 2.79  | 0,2A4-S         |
| 757.0947 | 0.030% | -1 | 3.37  | 0,2X3-S-2H      |
| 758.1018 | 0.017% | -1 | 2.41  | 0,2X3-S-H       |
| 811.1015 | 0.008% | -1 | -1.43 | M''-H2O-CO2-SO3 |
| 816.0846 | 0.042% | -1 | 3.65  | 0,2A4           |

|          |        |    |       |                    |
|----------|--------|----|-------|--------------------|
| 828.1088 | 0.011% | -1 | 4.07  | 1,5A4-S-H          |
| 829.1155 | 0.006% | -1 | 2.70  | M"-CO2-SO3;1,5A4-S |
| 838.0608 | 0.003% | -1 | 4.85  | 0,2X3-H            |
| 856.1040 | 0.019% | -1 | 4.31  | M'-H2O-SO3         |
| 857.1078 | 0.006% | -1 | -0.34 | M-H2O-SO3          |
| 873.1069 | 0.012% | -1 | 4.45  | M"-SO3             |

Table S11. List of assigned peaks in the NETD spectrum of [1, 1, 2, 1, 4] from HSPIM, [M - 4H]<sup>4+</sup>

| m/z      | Intensity | Charge | Error (ppm) | Assignment     |
|----------|-----------|--------|-------------|----------------|
| 129.0193 | 0.019%    | -2     | -0.34       | 2,5A2-S-2H     |
| 138.6426 | 0.011%    | -3     | -0.47       | Y1             |
| 157.0142 | 0.065%    | -1     | -0.43       | B1             |
| 159.4839 | 0.047%    | -2     | -0.39       | Z1-S           |
| 168.4892 | 0.098%    | -2     | -0.41       | Y1-S           |
| 175.0247 | 0.640%    | -1     | -0.57       | C1             |
| 178.0024 | 0.017%    | -2     | -3.36       | 0,2A2          |
| 197.3199 | 0.017%    | -3     | -0.49       | Y2             |
| 199.4623 | 0.013%    | -2     | -0.44       | Z1             |
| 208.4675 | 0.306%    | -2     | -0.71       | Y1             |
| 219.5215 | 0.118%    | -2     | -0.49       | B2             |
| 222.4650 | 0.455%    | -2     | -0.58       | 1,5X1          |
| 228.5267 | 0.318%    | -2     | -0.75       | C2             |
| 228.9689 | 0.043%    | -2     | -0.48       | 0,2X1-H        |
| 238.0026 | 0.084%    | -1     | -0.43       | Z1''-2S        |
| 239.0103 | 0.017%    | -1     | -0.74       | Z1'-2S         |
| 240.0182 | 0.183%    | -1     | -0.48       | Z1-2S          |
| 247.4999 | 0.224%    | -2     | -0.53       | Z2-S           |
| 247.9539 | 0.013%    | -1     | -0.60       | 0,3X0          |
| 255.4973 | 0.015%    | -2     | -0.53       | Y2''-S         |
| 256.0131 | 0.030%    | -1     | -0.61       | Y1''-2S        |
| 256.5051 | 0.095%    | -2     | -0.54       | Y2-S           |
| 258.0287 | 0.233%    | -1     | -0.72       | Y1-2S          |
| 259.0096 | 0.070%    | -3     | 0.04        | Z3-S           |
| 265.0130 | 0.061%    | -3     | -0.54       | Y3-S           |
| 270.5026 | 0.036%    | -2     | -0.58       | 1,5X2-S        |
| 271.3555 | 0.020%    | -3     | -0.68       | 0,2A4-S        |
| 274.3446 | 0.016%    | -3     | -0.66       | 1,5X3-S        |
| 277.5269 | 0.058%    | -2     | -0.63       | 2,5A3-2H       |
| 279.0163 | 0.509%    | -3     | -1.18       | 0,2X3-S        |
| 286.4704 | 0.028%    | -2     | -0.63       | Z2''           |
| 286.5322 | 0.041%    | -2     | -0.66       | 0,2A3          |
| 287.4781 | 0.294%    | -2     | -0.89       | Z2             |
| 290.9934 | 0.056%    | -3     | -0.63       | Y3''           |
| 291.3296 | 0.029%    | -3     | 0.42        | Y3'            |
| 291.6653 | 0.082%    | -3     | -0.40       | Y3             |
| 295.4756 | 0.262%    | -2     | -0.84       | Y2''           |
| 296.6840 | 0.013%    | -3     | -0.80       | M'-H2O-CO2-SO3 |
| 298.0078 | 0.106%    | -3     | -0.64       | 0,2A4          |

|          |        |    |       |             |
|----------|--------|----|-------|-------------|
| 298.0243 | 0.064% | -1 | 1.66  | 0,2X1-2S-2H |
| 298.0243 | 0.064% | -2 | 1.66  | 0,2X2-S     |
| 300.0393 | 0.571% | -1 | -0.56 | 0,2X1-2S    |
| 300.9968 | 0.018% | -3 | -0.77 | 1,5X3       |
| 302.6875 | 0.011% | -3 | -0.84 | M'-CO2-SO3  |
| 305.3328 | 0.016% | -3 | -0.53 | 0,2X3-H     |
| 305.6688 | 0.244% | -3 | -0.38 | 0,2X3       |
| 307.0336 | 0.026% | -2 | -0.39 | B3'         |
| 307.5375 | 0.062% | -2 | -0.49 | B3          |
| 310.4811 | 0.212% | -2 | -0.18 | 1,5X2       |
| 311.6833 | 0.287% | -3 | -0.61 | M-H2O-SO3   |
| 315.5349 | 0.014% | -2 | -0.61 | C3"         |
| 316.5427 | 0.480% | -2 | -0.56 | C3          |
| 317.0149 | 0.011% | -3 | -0.60 | M"-SO3      |
| 317.3512 | 0.009% | -3 | 0.52  | M'-SO3      |
| 317.6868 | 0.171% | -3 | -0.56 | M-SO3       |
| 317.9593 | 0.019% | -1 | -0.61 | Z1"-S       |
| 318.9671 | 0.015% | -1 | -0.68 | Z2'-S       |
| 319.9750 | 0.057% | -1 | -0.60 | Z1-S        |
| 323.3364 | 0.042% | -3 | -0.52 | M'-H2O-CO2  |
| 328.0342 | 0.042% | -2 | -0.53 | 2,4X2-2S    |
| 329.3399 | 0.011% | -3 | -0.48 | M'-CO2      |
| 335.9699 | 0.013% | -1 | -0.45 | Y1"-S       |
| 337.9856 | 0.109% | -1 | -0.48 | Y1-S        |
| 337.9995 | 0.096% | -3 | -0.77 | M'-H2O      |
| 339.0027 | 0.017% | -1 | -0.24 | 2,5A2-2H    |
| 343.6671 | 0.016% | -3 | -0.71 | M"          |
| 344.0032 | 0.043% | -3 | -0.38 | M'          |
| 344.3393 | 0.533% | -3 | 0.03  | M           |
| 345.4955 | 0.038% | -2 | -0.70 | 2,5X2-H     |
| 348.5356 | 0.010% | -2 | -0.46 | Z3'-2S      |
| 349.0395 | 0.097% | -2 | -0.52 | Z3-2S       |
| 357.0132 | 0.202% | -1 | -0.39 | 0,2A2       |
| 357.0371 | 0.013% | -2 | -0.16 | Y3"-2S      |
| 358.0448 | 0.017% | -2 | -0.46 | Y3-2S       |
| 365.9805 | 0.073% | -1 | -0.51 | 1,5X1-S     |
| 377.9804 | 0.027% | -1 | -0.51 | 0,2X1-S-2H  |
| 378.1040 | 0.029% | -1 | -0.52 | C2-S        |
| 378.9883 | 0.076% | -1 | -0.52 | 0,2X1-S-H   |
| 384.7103 | 0.023% | -3 | -0.44 | M'-SO3+A    |
| 385.0457 | 0.013% | -3 | -1.78 | M-SO3+A     |
| 389.0179 | 0.177% | -2 | -0.40 | Z3-S        |
| 397.0153 | 0.050% | -2 | -0.50 | Y3"-S       |



|          |        |    |       |                      |
|----------|--------|----|-------|----------------------|
| 397.5197 | 0.033% | -2 | 0.51  | Y3'-S                |
| 398.0233 | 0.164% | -2 | -0.05 | Y3-S                 |
| 407.5370 | 0.107% | -2 | -0.38 | 0,2A4-S              |
| 410.0397 | 0.020% | -1 | -0.49 | 1,5A2-2H             |
| 412.0553 | 0.090% | -1 | -0.51 | 1,5A2                |
| 414.0346 | 0.044% | -1 | -0.45 | Z2''-2S              |
| 415.9269 | 0.015% | -1 | 0.11  | Y1''                 |
| 416.0503 | 0.028% | -1 | -0.34 | Z2-2S                |
| 417.9424 | 0.085% | -1 | -0.44 | Y1                   |
| 418.0207 | 0.019% | -2 | -0.38 | 0,2X3-S-2H           |
| 418.5246 | 0.705% | -2 | -0.41 | 0,2X3-S-H            |
| 426.0183 | 0.015% | -2 | 0.08  | 2,5X3-S-2H           |
| 428.9963 | 0.037% | -2 | -0.53 | Z3                   |
| 432.0181 | 0.015% | -2 | -0.35 | 1,4A4                |
| 436.9937 | 0.013% | -2 | -0.45 | Y3''                 |
| 438.0016 | 0.062% | -2 | -0.41 | Y3                   |
| 438.0346 | 0.054% | -1 | -0.53 | B2''                 |
| 439.0428 | 0.016% | -1 | 0.48  | B2'                  |
| 440.0502 | 0.213% | -1 | -0.49 | B2                   |
| 445.9373 | 0.101% | -1 | -0.36 | 1,5X1                |
| 447.5152 | 0.021% | -2 | -0.79 | 0,2A4                |
| 453.0237 | 0.017% | -2 | 0.37  | 1,5A4-S-2H           |
| 454.0310 | 0.255% | -2 | -0.94 | M''-CO2-SO3; 1,5A4-S |
| 456.0452 | 0.497% | -1 | -0.31 | C2''                 |
| 458.0607 | 7.199% | -1 | -0.71 | C2                   |
| 458.5029 | 0.244% | -2 | -0.56 | 0,2X3-H              |
| 458.9450 | 0.068% | -1 | -0.61 | 0,2X1-H              |
| 462.0549 | 0.016% | -1 | -2.15 | 1,5X2-2S             |
| 467.0207 | 0.071% | -2 | -0.70 | M''-H2O-SO3          |
| 467.5247 | 0.090% | -2 | -0.48 | M'-H2O-SO3           |
| 468.0283 | 0.047% | -2 | -1.14 | M-H2O-SO3            |
| 476.0261 | 0.117% | -2 | -0.51 | M''-SO3              |
| 477.0342 | 0.021% | -2 | 0.10  | M-SO3                |
| 485.0043 | 0.039% | -2 | -0.47 | M''-H2O-CO2          |
| 485.5061 | 0.012% | -2 | -4.88 | M'-H2O-CO2           |
| 493.9917 | 0.024% | -1 | 0.20  | Z2''-S               |
| 494.0095 | 0.042% | -2 | -0.57 | M''-CO2;1,5A4        |
| 496.0070 | 0.067% | -1 | -0.51 | Z2-S                 |
| 499.0635 | 0.052% | -1 | -0.44 | 2,4A3-H              |
| 500.0716 | 0.089% | -1 | 0.02  | 2,4A3                |
| 514.0177 | 0.012% | -1 | -0.31 | Y2-S                 |
| 518.0819 | 0.131% | -1 | -0.47 | 2,4A4-S              |
| 526.0503 | 0.011% | -1 | -0.91 | 3,5A3-2H             |

|          |        |    |       |          |
|----------|--------|----|-------|----------|
| 528.0662 | 1.123% | -1 | -0.52 | 3,5A3    |
| 536.1254 | 0.020% | -1 | -0.61 | B3-S     |
| 542.0125 | 0.049% | -1 | -0.34 | 1,5X2-S  |
| 552.1205 | 0.011% | -1 | -0.14 | C3"-S    |
| 554.1360 | 0.152% | -1 | -0.49 | C3-S     |
| 556.0613 | 0.033% | -1 | -0.21 | 2,5A3-2H |
| 574.0717 | 0.050% | -1 | -0.40 | 0,2A3    |
| 577.5689 | 0.013% | -2 | -0.75 | M'-SO3+A |
| 588.0876 | 0.018% | -1 | 0.06  | 1,5A3    |
| 614.0668 | 0.027% | -1 | -0.18 | B3"      |
| 615.0745 | 0.968% | -1 | -0.30 | B3'      |
| 616.0826 | 0.984% | -1 | 0.17  | B3       |
| 621.9699 | 0.011% | -1 | 0.51  | 1,5X2    |
| 632.0774 | 0.063% | -1 | -0.07 | C3"      |
| 634.0930 | 0.664% | -1 | -0.21 | C3       |

Table S12. List of assigned peaks in the NETD spectrum of [1, 1, 2, 1, 5] from HSPIM, [M - 4H]<sup>4+</sup>

| m/z      | Intensity | Charge | Error (ppm) | Assignment             |
|----------|-----------|--------|-------------|------------------------|
| 175.0248 | 0.015%    | -1     | -0.09       | C1-S                   |
| 199.4621 | 0.017%    | -2     | -1.26       | Z1                     |
| 208.4675 | 0.120%    | -2     | -0.67       | Y1                     |
| 217.9813 | 0.035%    | -2     | -0.57       | 0,2A2                  |
| 220.9916 | 0.179%    | -3     | 2.26        | 1,4X2-S-H              |
| 222.4650 | 0.151%    | -2     | -0.59       | 1,5X1                  |
| 236.9709 | 0.039%    | -1     | -0.69       | B1                     |
| 238.0025 | 0.212%    | -1     | -0.65       | Z1"-2S                 |
| 240.0182 | 0.086%    | -1     | -0.69       | Z1-2S                  |
| 246.0618 | 0.017%    | -1     | -0.63       | 1,4A2-S                |
| 246.4921 | 0.032%    | -2     | -0.37       | Z2"-S                  |
| 247.4998 | 0.045%    | -2     | -0.70       | Z2-S                   |
| 247.9536 | 0.009%    | -1     | -1.61       | 0,3X0<br>1,4X1; 3,5X1- |
| 251.4677 | 0.045%    | -2     | -0.57       | 2H                     |
| 252.9658 | 0.267%    | -1     | -0.57       | C1"                    |
| 254.9816 | 0.283%    | -1     | -0.22       | C1                     |
| 256.0131 | 0.034%    | -1     | -0.69       | Y1"-2S                 |
| 256.5050 | 0.040%    | -2     | -0.93       | Y2-S                   |
| 258.0288 | 0.056%    | -1     | -0.57       | Y1-2S                  |
| 258.9959 | 0.032%    | -2     | -0.74       | B2'                    |
| 267.4972 | 0.114%    | -2     | -0.75       | C2"                    |
| 268.5051 | 0.045%    | -2     | -0.76       | C2                     |
| 277.5269 | 0.031%    | -2     | -0.44       | 2,5A3-S-H              |
| 284.0078 | 0.018%    | -1     | -1.27       | 1,5X1-2S-2H            |
| 285.0158 | 0.133%    | -1     | -0.75       | 1,5X1-2S-H             |
| 286.0235 | 0.016%    | -1     | -0.98       | 1,5X1-2S               |
| 286.4703 | 0.043%    | -2     | -0.90       | Z2"                    |
| 287.4782 | 0.162%    | -2     | -0.81       | Z2                     |
| 287.6760 | 0.021%    | -3     | -1.37       | 1,4A4-S                |
| 291.6653 | 0.023%    | -3     | -0.58       | Y3                     |
| 295.4755 | 0.043%    | -2     | -1.13       | Y2"                    |
| 296.4834 | 0.413%    | -2     | -0.87       | Y2                     |
| 300.0391 | 0.020%    | -1     | -1.36       | 0,2X1-2S               |
| 303.5078 | 0.135%    | -2     | -0.81       | 3,5A3                  |
| 305.3328 | 0.017%    | -3     | -0.73       | 0,2X3-S-H              |
| 310.4810 | 0.435%    | -2     | -0.35       | 1,5X2                  |
| 314.3286 | 0.019%    | -3     | -0.38       | 1,4A4                  |
| 315.0262 | 0.018%    | -1     | -1.01       | 2,5X1-2S-H             |

|          |        |    |       |            |
|----------|--------|----|-------|------------|
| 316.5425 | 0.021% | -2 | -1.31 | C3-S       |
| 317.9594 | 0.022% | -1 | -0.23 | Z1"-S      |
| 319.9748 | 0.038% | -1 | -0.98 | Z1-S       |
| 326.5105 | 0.033% | -2 | -0.70 | 0,2A3      |
| 328.0341 | 0.039% | -2 | -0.83 | 2,4X2-2S   |
| 331.9848 | 0.019% | -3 | -1.46 | 0,2X3-H    |
| 337.4981 | 0.027% | -2 | -0.56 | 0,2X2-H    |
| 337.6635 | 0.016% | -3 | -1.10 | M"-H2O-SO3 |
| 337.9855 | 0.077% | -1 | -0.75 | Y1-S       |
| 338.3355 | 0.194% | -3 | -0.68 | M-H2O-SO3  |
| 343.6671 | 0.032% | -3 | -0.71 | M"-SO3     |
| 344.3388 | 0.173% | -3 | -1.33 | M-SO3      |
| 347.0117 | 0.016% | -2 | -1.25 | B3'        |
| 347.5158 | 0.123% | -2 | -0.73 | B3         |
| 353.4991 | 0.015% | -2 | -1.06 | 1,4X2-S    |
| 355.5132 | 0.114% | -2 | -0.81 | C3"        |
| 356.5210 | 1.462% | -2 | -0.82 | C3         |
| 365.9804 | 0.133% | -1 | -0.73 | 1,5X1-S    |
| 368.0123 | 0.022% | -2 | -1.23 | 2,4X2-S    |
| 370.3194 | 0.034% | -3 | -0.78 | M"         |
| 370.6554 | 0.033% | -3 | -0.58 | M'         |
| 370.9913 | 0.146% | -3 | -0.70 | M          |
| 378.9879 | 0.024% | -1 | -1.44 | 0,2X1-S-H; |
| 388.0100 | 0.045% | -2 | -0.57 | Z3"-S      |
| 388.5142 | 0.041% | -2 | 0.15  | Z3'-S      |
| 389.0180 | 0.276% | -2 | -0.32 | Z3-S       |
| 392.0290 | 0.064% | -2 | 2.60  | 0,3A4-S-H  |
| 397.0150 | 0.090% | -2 | -1.29 | Y3"-S      |
| 398.0232 | 0.047% | -2 | -0.44 | Y3-S       |
| 407.9908 | 0.029% | -1 | -1.02 | 0,3X1-S-2H |
| 407.9908 | 0.029% | -2 | -1.02 | 2,4X2      |
| 410.0396 | 0.034% | -1 | -0.76 | 1,5A2-S-2H |
| 411.3624 | 0.050% | -3 | -0.80 | M'-SO3+A   |
| 411.6971 | 0.028% | -3 | -3.76 | M-SO3+A    |
| 412.0551 | 0.021% | -1 | -0.98 | 1,5A2-S    |
| 414.0345 | 0.058% | -1 | -0.62 | Z2"-2S     |
| 415.0427 | 0.017% | -1 | 0.21  | Z2'-2S     |
| 416.0502 | 0.059% | -1 | -0.45 | Z2-2S      |
| 417.9422 | 0.077% | -1 | -0.76 | Y1         |
| 428.4921 | 0.161% | -2 | -1.08 | Z3'        |
| 428.9963 | 0.151% | -2 | -0.45 | Z3         |
| 432.0449 | 0.038% | -1 | -0.96 | Y2"-2S     |
| 434.0605 | 0.031% | -1 | -1.16 | Y2-2S      |

|          |        |    |       |            |
|----------|--------|----|-------|------------|
| 436.9698 | 0.209% | -1 | -0.77 | 0,2A2      |
| 436.9935 | 0.045% | -2 | -1.09 | Y3"        |
| 438.0013 | 0.030% | -2 | -0.98 | Y3         |
| 438.0345 | 0.030% | -1 | -0.69 | B2"-S      |
| 439.0424 | 0.035% | -1 | -0.43 | B2'-S      |
| 440.0501 | 0.054% | -1 | -0.72 | B2-S       |
| 445.9371 | 0.199% | -1 | -0.76 | 1,5X1      |
| 456.0450 | 0.097% | -1 | -0.74 | C2"-S      |
| 457.0532 | 0.033% | -1 | 0.03  | C2'-S      |
| 458.0607 | 0.293% | -1 | -0.66 | C2-S       |
| 458.5029 | 0.055% | -2 | -0.49 | 0,2X3-H    |
| 458.9448 | 0.043% | -1 | -1.01 | 0,2X1-H    |
| 462.0559 | 0.024% | -1 | 0.03  | 1,5X2-2S   |
| 465.9974 | 0.015% | -2 | 1.46  | 2,5X3-S-2H |
| 493.9910 | 0.043% | -1 | -1.14 | Z2"-S      |
| 494.9993 | 0.019% | -2 | -0.18 | 2,4X3-S-H  |
| 494.9993 | 0.019% | -1 | -0.18 | Z2'-S      |
| 496.0070 | 0.142% | -1 | -0.54 | Z2-S       |
| 500.0712 | 0.017% | -1 | -0.77 | 2,4A3-S    |
| 506.9991 | 0.026% | -2 | -0.63 | M"-H2O-SO3 |
| 508.0076 | 0.015% | -2 | 0.71  | M-H2O-SO3  |
| 512.0014 | 0.031% | -1 | -1.42 | Y2"-S      |
| 514.0175 | 0.126% | -1 | -0.67 | Y2-S       |
| 516.0044 | 0.110% | -2 | -0.56 | M"-SO3     |
| 518.9987 | 0.023% | -1 | -1.34 | B2'        |
| 520.0083 | 0.015% | -1 | 2.07  | B2         |
| 528.0662 | 0.050% | -1 | -0.57 | 3,5A3-S    |
| 536.0017 | 0.102% | -1 | -0.79 | C2"        |
| 538.0175 | 0.119% | -1 | -0.64 | C2         |
| 542.0124 | 0.181% | -1 | -0.60 | 1,5X2-S    |
| 575.9636 | 0.047% | -1 | -0.87 | Z2         |
| 593.9743 | 0.042% | -1 | -0.49 | Y2         |
| 608.0230 | 0.102% | -1 | -0.48 | 3,5A3      |
| 615.0744 | 0.106% | -1 | -0.47 | B3'-S      |
| 616.0822 | 0.085% | -1 | -0.48 | B3-S       |
| 621.9694 | 0.055% | -1 | -0.30 | 1,5X2      |
| 632.0772 | 0.044% | -1 | -0.42 | C3"-S      |
| 634.0928 | 0.124% | -1 | -0.50 | C3-S       |
| 695.0312 | 0.112% | -1 | -0.39 | B3'        |
| 696.0390 | 0.070% | -1 | -0.52 | B3         |
| 712.0331 | 0.016% | -1 | -1.68 | C3"        |
| 714.0500 | 0.023% | -1 | 0.20  | C3         |

Table S13. List of assigned peaks in the NETD spectrum of [1, 1, 2, 0, 6] from HSPIM, [M - 4H]<sup>4+</sup>

| m/z      | Intensity | Charge | Error (ppm) | Assignment     |
|----------|-----------|--------|-------------|----------------|
| 198.4540 | 0.182%    | -2     | -2.70       | Z1''           |
| 208.4671 | 0.018%    | -2     | -2.58       | Y1             |
| 217.9809 | 0.029%    | -2     | -2.59       | 0,2A2          |
| 222.4645 | 0.066%    | -2     | -2.62       | 1,5X1          |
| 236.9705 | 0.019%    | -1     | -2.53       | B1             |
| 238.0021 | 0.070%    | -1     | -2.61       | Z1''-2S        |
| 238.4941 | 0.022%    | -2     | -2.58       | B2-S           |
| 240.0177 | 0.013%    | -1     | -2.58       | Z1-2S          |
| 246.4915 | 0.034%    | -2     | -2.61       | C2''-S; Z2''-S |
| 247.4993 | 0.042%    | -2     | -2.85       | C2-S; Z2-S     |
| 247.9535 | 0.003%    | -1     | -2.02       | 0,3X0          |
| 252.9653 | 0.023%    | -1     | -2.75       | C1''           |
| 254.9809 | 0.248%    | -1     | -2.84       | C1             |
| 264.4750 | 0.014%    | -2     | -2.58       | 1,5A2          |
| 277.9685 | 0.038%    | -2     | -2.68       | B2'            |
| 278.4723 | 0.069%    | -2     | -2.76       | B2             |
| 282.5020 | 0.037%    | -2     | -2.65       | 3,5A3-S        |
| 286.0231 | 0.030%    | -1     | -2.60       | 1,5X1-2S       |
| 286.4698 | 1.986%    | -2     | -2.85       | C2''; Z2;      |
| 286.9739 | 1.021%    | -2     | -2.15       | C2'; Z2'       |
| 287.4775 | 16.690%   | -2     | -3.00       | C2;Z2          |
| 295.4750 | 0.376%    | -2     | -2.81       | Y2''           |
| 296.4827 | 0.242%    | -2     | -3.43       | Y2             |
| 300.0386 | 0.011%    | -1     | -2.92       | 0,2X1-2S       |
| 307.9787 | 0.010%    | -2     | -3.51       | 2,4A3-H        |
| 310.4803 | 0.074%    | -2     | -2.77       | 1,5X2          |
| 311.0069 | 0.015%    | -1     | -2.90       | 3,5A2-S        |
| 313.6452 | 0.002%    | -3     | -1.91       | 1,5X3          |
| 317.9585 | 0.150%    | -1     | -3.16       | Z1''-S         |
| 317.9809 | 0.023%    | -3     | -2.81       | 0,2X3-S-H      |
| 318.9664 | 0.026%    | -1     | -3.08       | Z1'-S          |
| 319.9742 | 0.047%    | -1     | -2.99       | Z1-S           |
| 322.4801 | 0.794%    | -2     | -3.29       | 3,5A3          |
| 326.5098 | 0.014%    | -2     | -2.84       | B3-S           |
| 331.4854 | 0.019%    | -2     | -3.15       | 1,4X2-S-2H     |
| 334.5072 | 0.018%    | -2     | -3.09       | C3''-S         |
| 335.5150 | 0.066%    | -2     | -2.97       | C3-S           |
| 335.9692 | 0.040%    | -1     | -2.60       | Y1''-S         |
| 336.4775 | 0.035%    | -2     | -3.20       | 2,5A3-2H       |

|          |        |    |       |                |
|----------|--------|----|-------|----------------|
| 337.9847 | 0.227% | -1 | -3.15 | Y1-S           |
| 344.6329 | 0.035% | -3 | -3.15 | 0,2X3-H        |
| 344.9691 | 0.007% | -3 | -2.32 | 0,2X3          |
| 344.9798 | 0.036% | -2 | -0.34 | 0,2A3-S-H      |
| 345.4828 | 0.012% | -2 | -3.05 | 0,2A3          |
| 350.3115 | 0.028% | -3 | -3.07 | M"-H2O-SO3     |
| 350.6480 | 0.036% | -3 | -1.59 | M'-H2O-SO3     |
| 350.9834 | 0.054% | -3 | -3.00 | M-H2O-SO3      |
| 351.9866 | 0.019% | -2 | -3.44 | 1,5A3-H        |
| 356.3148 | 0.125% | -3 | -3.81 | M"-SO3         |
| 356.4702 | 0.105% | -2 | -3.45 | 0,2X2-H        |
| 356.6509 | 0.046% | -3 | -3.28 | M'-SO3         |
| 356.9868 | 0.537% | -3 | -3.44 | M-SO3          |
| 357.0121 | 0.098% | -1 | -3.30 | 0,2A2-S        |
| 363.9638 | 0.039% | -1 | -3.30 | 1,5X1-S-2H     |
| 363.9638 | 0.039% | -2 | -3.30 | 2,5X2-2H       |
| 365.4800 | 0.015% | -2 | -3.67 | B3"            |
| 365.9793 | 0.201% | -1 | -3.71 | 1,5X1-S        |
| 368.0280 | 0.010% | -1 | -3.56 | 1,5A2-2S-2H    |
| 368.3039 | 0.041% | -3 | -3.33 | M"-CO2; 1,5A4  |
| 368.6399 | 0.050% | -3 | -3.11 | M'-CO2         |
| 370.0437 | 0.010% | -1 | -3.36 | 1,5A2-2S       |
| 374.4852 | 0.094% | -2 | -3.73 | C3"            |
| 375.4931 | 0.937% | -2 | -3.66 | C3             |
| 376.9642 | 0.037% | -3 | -1.70 | M"-H2O         |
| 377.2995 | 0.052% | -3 | -3.46 | M'-H2O         |
| 377.9792 | 0.021% | -1 | -3.70 | 0,2X1-S-2H     |
| 378.9871 | 0.065% | -1 | -3.72 | 0,2X1-S-H      |
| 382.9670 | 0.051% | -3 | -3.77 | M"             |
| 383.3029 | 0.488% | -3 | -3.71 | M'             |
| 383.6390 | 0.588% | -3 | -3.30 | M              |
| 390.9631 | 0.036% | -1 | -4.00 | 3,5A2          |
| 396.0227 | 0.043% | -1 | -3.76 | B2"-2S         |
| 397.0304 | 0.036% | -1 | -4.11 | B2'-2S         |
| 397.9148 | 0.024% | -1 | -3.74 | Z1"            |
| 398.0382 | 0.084% | -1 | -4.26 | B2-2S          |
| 399.9305 | 0.020% | -1 | -3.79 | Z1             |
| 402.4981 | 0.010% | -2 | -4.10 | 3,5A4-S-2H     |
| 405.9739 | 0.010% | -1 | -4.03 | 1,4A2          |
| 406.9817 | 0.080% | -2 | -4.02 | Z3"-S          |
| 407.9895 | 0.207% | -2 | -4.14 | Z3-S           |
| 410.4955 | 0.013% | -2 | -4.05 | 0,3A4-S-2H     |
| 414.0330 | 0.317% | -1 | -4.25 | C2"-2S; Z2"-2S |

|          |        |    |       |              |
|----------|--------|----|-------|--------------|
| 415.9869 | 0.056% | -2 | -4.24 | Y3"-S        |
| 416.0487 | 0.053% | -1 | -4.07 | C2-2S;Z2-2S  |
| 416.9947 | 0.068% | -2 | -4.29 | Y3-S         |
| 417.9408 | 0.440% | -1 | -4.08 | Y1           |
| 420.9734 | 0.011% | -1 | -4.23 | 2,5A2        |
| 424.0104 | 0.134% | -3 | -2.67 | M'-SO3+A     |
| 432.0435 | 0.013% | -1 | -4.25 | Y2"-2S       |
| 435.9605 | 0.012% | -1 | -4.26 | 0,2A2-H      |
| 436.9683 | 0.063% | -1 | -4.30 | 0,2A2        |
| 443.4840 | 0.002% | -2 | -4.28 | 3,5A4        |
| 445.9356 | 0.278% | -1 | -4.25 | 1,5X1        |
| 447.4637 | 0.014% | -2 | -4.44 | Z3'          |
| 447.9675 | 0.106% | -2 | -4.80 | Z3           |
| 447.9840 | 0.069% | -1 | -4.75 | 1,5A2-S-2H   |
| 448.9923 | 0.035% | -1 | -3.76 | 1,5A2-S-H    |
| 449.9998 | 0.058% | -1 | -4.40 | 1,5A2-S      |
| 455.9650 | 0.024% | -2 | -4.63 | Y3"          |
| 456.9727 | 0.040% | -2 | -4.85 | Y3           |
| 458.9431 | 0.121% | -1 | -4.69 | 0,2X1-H      |
| 475.9789 | 0.054% | -1 | -4.59 | B2"-S        |
| 476.9865 | 0.199% | -1 | -4.97 | B2'-S        |
| 477.4739 | 0.071% | -2 | -4.89 | 0,2X3-S-H    |
| 486.0535 | 0.015% | -1 | -4.93 | 3,5A3-2S     |
| 487.9459 | 0.013% | -1 | -4.35 | 0,3X1-2H     |
| 494.9970 | 0.522% | -1 | -4.86 | C2'-S; Z2'-S |
| 496.0049 | 0.544% | -1 | -4.74 | C2-S; Z2-S   |
| 506.4646 | 0.004% | -2 | -4.94 | 0,2A4        |
